# Supplementary material for: Integrative analysis of uterine leiomyoma genetics, epigenomics, and single-cell transcriptomics reveals causal genetic variants, gene targets, and cell types
Source: Research Square preprint supplement (doi:10.21203/rs.3.rs-2548537/v1), 2023-02-14
Supplement: Supplementary file 1 [file 3c8c1d07e671f26095f37207.xlsx]

## Sheet: Sheet1
ensg	symbol	chr	start	end	strand	type	entrezID	HUGO	pLI	ncRVIS	posMapSNPs	posMapMaxCADD	eqtlMapSNPs	eqtlMapminP	eqtlMapminQ	eqtlMapts	eqtlDirection	ciMap	ciMapts	minGwasP	IndSigSNPs	GenomicLocus
ENSG00000108387	2021-09-04	17	56597611	56618179	-1	protein_coding	5414	2021-09-04	0.0118369	-0.315891	0	0	1	2.7508e-06	0.0201777	eQTLGen_trans_eQTLs	NA	No	NA	2.551e-08	rs2853677	7
ENSG00000150967	ABCB9	12	123405498	123466196	-1	protein_coding	23457	ABCB9	0.00290111	NA	5	16.51	233	7.7867e-219	0	eQTLcatalogue/BLUEPRINT_ge_T-cell:eQTLcatalogue/CEDAR_T-cell_CD4:eQTLcatalogue/HipSci_ge_iPSC:eQTLcatalogue/Kasela_2017_T-cell_CD4:eQTLcatalogue/TwinsUK_ge_skin:PsychENCODE_eQTLs:DICE/T_CD8_naive:DICE/NK:DICE/T_CD4_TFH:DICE/T_CD4_TH17:DICE/T_CD4_memory_TREG:eQTLGen_cis_eQTLs:BIOSQTL/BIOS_eQTL_geneLevel:GTEx/v8/Whole_Blood:GTEx/v8/Artery_Aorta:GTEx/v8/Artery_Tibial:GTEx/v8/Colon_Sigmoid:GTEx/v8/Co…	NA	Yes	Promoter_anchored_loops:Spleen:GM12878:IMR90:Mesenchymal_Stem_Cell:Mesendoderm:Trophoblast-like_Cell:hESC	7.637e-09	rs641760;rs28372579;rs12820906;rs1716162;rs4930719;rs641760:rs641760;rs28372579:rs641760	17
ENSG00000268503	AC007421.1	17	7517264	7517427	1	protein_coding	NA	NA	NA	NA	0	0	0	NA	NA	NA	NA	Yes	Adult_Cortex:Fetal_Cortex:Hippocampus:GM12878:IMR90:Mesenchymal_Stem_Cell:Mesendoderm:hESC	2.446e-14	rs143094271:rs78414518:rs17879377	21
ENSG00000215067	AC027763.2	17	6779954	6915668	-1	protein_coding	100506713	ALOX12-AS1	NA	NA	0	0	1	5.52562e-07	0.00646016	GTEx/v7/Small_Intestine_Terminal_Ileum	NA	No	NA	2.231e-13	rs143094271	21
ENSG00000232056	AC092687.4	2	10987703	10995081	1	protein_coding	NA	NA	NA	NA	0	0	0	NA	NA	NA	NA	Yes	Left_Ventricle:IMR90:Mesenchymal_Stem_Cell:Mesendoderm	7.127e-12	rs10929754:rs10929753:rs12994384:rs12994384;rs4669748:rs974163:rs4669748:rs6728828:rs10929757:rs4668732:rs1529868:rs10929759:rs16857668:rs11679605	3
ENSG00000072818	ACAP1	17	7239848	7254797	1	protein_coding	9744	ACAP1	0.237756	-0.214185	0	0	0	NA	NA	NA	NA	Yes	GM12878:IMR90	2.446e-14	rs78414518:rs143094271	21
ENSG00000075239	ACAT1	11	107992243	108018503	1	protein_coding	38	ACAT1	0.00159952	-0.25018	5	7.49	88	8.6756e-59	0	eQTLcatalogue/CEDAR_rectum:eQTLcatalogue/Fairfax_2012_B-cell_CD19:eQTLcatalogue/GEUVADIS_ge_LCL:eQTLcatalogue/TwinsUK_ge_blood:scRNA_eQTLs/PBMC:eQTLGen_cis_eQTLs:BIOSQTL/BIOS_eQTL_geneLevel:GTEx/v8/Adrenal_Gland:GTEx/v8/Brain_Anterior_cingulate_cortex_BA24:GTEx/v8/Liver:GTEx/v8/Lung:GTEx/v8/Muscle_Skeletal:GTEx/v8/Pituitary:GTEx/v8/Cells_Cultured_fibroblasts:GTEx/v8/Skin_Not_Sun_Exposed_Suprapubi…	NA	Yes	Adult_Cortex:Fetal_Cortex:Left_Ventricle:Liver:GM12878:IMR90:Mesenchymal_Stem_Cell:Mesendoderm:Trophoblast-like_Cell:hESC	7.052e-19	rs72993806;rs189426461;rs79088165;rs71488291;rs111559044;rs149934734;rs117706999;rs117706999:rs78142456:rs72993806:rs79088165	15
ENSG00000184378	ACTRT3	3	169484709	169487683	-1	protein_coding	84517	ACTRT3	0.000670124	0.775758	16	21.9	37	5.07682e-40	2.53841e-36	eQTLcatalogue/Alasoo_2018_ge_macrophage_IFNg:eQTLcatalogue/Alasoo_2018_ge_macrophage_naive:eQTLcatalogue/Alasoo_2018_ge_macrophage_Salmonella:eQTLcatalogue/HipSci_ge_iPSC:eQTLcatalogue/Nedelec_2016_ge_macrophage_naive:eQTLcatalogue/TwinsUK_ge_fat:GTEx/v8/Pituitary:GTEx/v8/Cells_Cultured_fibroblasts:GTEx/v8/Thyroid	NA	No	NA	4.061e-08	rs2293607	4
ENSG00000114948	ADAM23	2	207308263	207485851	1	protein_coding	8745	ADAM23	0.995404	-0.6067	0	0	3	1.3667e-06	0.0107671	eQTLGen_trans_eQTLs	NA	No	NA	7.126e-08	rs2293607	4
ENSG00000239900	ADSL	22	40742507	40786467	1	protein_coding	158	ADSL	0.000212575	-0.459232	0	0	47	6.9543e-51	0	PsychENCODE_eQTLs:eQTLGen_cis_eQTLs:BIOSQTL/BIOS_eQTL_geneLevel:GTEx/v8/Adipose_Subcutaneous:GTEx/v8/Artery_Tibial:GTEx/v8/Heart_Atrial_Appendage:GTEx/v8/Muscle_Skeletal:GTEx/v8/Cells_Cultured_fibroblasts:GTEx/v8/Testis	NA	Yes	Aorta:Hippocampus:Left_Ventricle:Liver:Pancreas:Right_Ventricle:GM12878:IMR90:Mesenchymal_Stem_Cell:Mesendoderm:Trophoblast-like_Cell:hESC	1.037e-12	rs112251865;rs6001872;rs6001872:rs112251865	23
ENSG00000181026	AEN	15	89164527	89175513	1	protein_coding	64782	AEN	6.06476e-08	1.60153	0	0	3	9.4096e-07	0.00775904	eQTLGen_trans_eQTLs	NA	No	NA	3.841e-26	rs143094271;rs78378222;rs35850753	21
ENSG00000023516	AKAP11	13	42846289	42897396	1	protein_coding	11215	AKAP11	0.896373	0.143075	0	0	0	NA	NA	NA	NA	Yes	IMR90	4.147e-09	rs61963209	19
ENSG00000166971	AKTIP	16	53524952	53538323	-1	protein_coding	64400	AKTIP	0.788013	-0.341576	0	0	0	NA	NA	NA	NA	Yes	IMR90	2.816e-07	rs66998222	20
ENSG00000269120	AL133318.1	13	41111138	41111323	-1	protein_coding	NA	NA	NA	NA	0	0	12	1.10569e-05	0.00756112	BIOSQTL/BIOS_eQTL_geneLevel	NA	No	NA	7.359e-11	rs1986649;rs2297014	19
ENSG00000213121	AL590867.1	6	153552455	153668623	1	protein_coding	NA	NA	NA	NA	0	0	2	0.000628038	0.0398051	PsychENCODE_eQTLs	NA	No	NA	1.959e-14	rs13206045;rs13196107;rs35569312	8
ENSG00000137760	ALKBH8	11	107373452	107436472	-1	protein_coding	91801	ALKBH8	0.00282935	-0.629784	0	0	0	NA	NA	NA	NA	Yes	IMR90:Mesenchymal_Stem_Cell	1.049e-12	rs79088165:rs78142456	15
ENSG00000108839	ALOX12	17	6899384	6914055	1	protein_coding	239	ALOX12	6.34478e-10	-0.209571	0	0	1	6.0338e-06	0.0385608	eQTLGen_trans_eQTLs	NA	No	NA	1.598e-12	rs2736100	7
ENSG00000179593	ALOX15B	17	7942335	7952452	1	protein_coding	247	ALOX15B	1.91965e-12	0.308899	0	0	0	NA	NA	NA	NA	Yes	Adult_Cortex	3.419e-07	rs17879377	21
ENSG00000179148	ALOXE3	17	7999218	8022365	-1	protein_coding	59344	ALOXE3	2.16325e-13	0.822045	0	0	0	NA	NA	NA	NA	Yes	Adult_Cortex:Fetal_Cortex:GM12878:IMR90:Mesenchymal_Stem_Cell:Mesendoderm	1.438e-07	rs17879377:rs78414518	21
ENSG00000162551	ALPL	1	21835858	21904905	1	protein_coding	249	ALPL	0.0011065	1.03284	0	0	10	5.36358e-05	7.32925e-15	GTEx/v8/Cells_Cultured_fibroblasts	NA	No	NA	3.921e-20	rs2235529;rs10917130;rs3765350;rs12404660;rs12410251;rs72478520	1
ENSG00000139211	AMIGO2	12	47469490	47473734	-1	protein_coding	347902	AMIGO2	0.545242	0.501354	0	0	0	NA	NA	NA	NA	Yes	IMR90:Mesenchymal_Stem_Cell:Mesendoderm:hESC	3.465e-08	rs7976280	16
ENSG00000185101	ANO9	11	417933	442011	-1	protein_coding	338440	ANO9	4.59378e-11	-0.0372485	0	0	33	2.78272e-09	2.33953e-07	GTEx/v8/Brain_Caudate_basal_ganglia:GTEx/v8/Brain_Putamen_basal_ganglia:GTEx/v7/Brain_Caudate_basal_ganglia:GTEx/v7/Brain_Putamen_basal_ganglia:GTEx/v6/Brain_Caudate_basal_ganglia:GTEx/v6/Brain_Putamen_basal_ganglia	NA	Yes	Promoter_anchored_loops	4.776e-13	rs532483;rs547025;rs11246035;rs12419714;rs547025:rs532483	11
ENSG00000268467	AP000889.3	11	107462471	107463949	1	protein_coding	NA	NA	NA	NA	0	0	0	NA	NA	NA	NA	Yes	IMR90:Mesenchymal_Stem_Cell	1.049e-12	rs79088165:rs78142456	15
ENSG00000269042	AP001925.1	11	108130255	108136480	-1	protein_coding	NA	NA	NA	NA	6	24	0	NA	NA	NA	NA	No	NA	6.219e-18	rs72993806;rs189426461;rs182609357;rs78142456;rs149934734	15
ENSG00000268602	AP002353.1	11	107582998	107595135	1	protein_coding	NA	NA	NA	NA	0	0	0	NA	NA	NA	NA	Yes	Trophoblast-like_Cell	1.049e-12	rs79088165:rs78142456	15
ENSG00000149089	APIP	11	34874641	34938046	-1	protein_coding	51074	APIP	4.19693e-10	NA	0	0	36	2.77564e-15	0	eQTLcatalogue/BrainSeq_ge_brain:PsychENCODE_eQTLs:BIOSQTL/BIOS_eQTL_geneLevel:xQTLServer_eQTLs:CMC_SVA_cis:GTEx/v8/Adipose_Subcutaneous:GTEx/v8/Adipose_Visceral_Omentum:GTEx/v8/Brain_Anterior_cingulate_cortex_BA24:GTEx/v8/Brain_Caudate_basal_ganglia:GTEx/v8/Brain_Cerebellar_Hemisphere:GTEx/v8/Brain_Cortex:GTEx/v8/Brain_Hypothalamus:GTEx/v8/Esophagus_Gastroesophageal_Junction:GTEx/v8/Esophagus_Mus…	NA	Yes	GM12878:IMR90:Mesenchymal_Stem_Cell	1.198e-08	rs2553772	14
ENSG00000179750	APOBEC3B	22	39378352	39388809	1	protein_coding	9582	APOBEC3B	2.50835e-05	-0.173422	0	0	0	NA	NA	NA	NA	Yes	Mesenchymal_Stem_Cell	3.144e-12	rs6001872:rs112251865	23
ENSG00000244509	APOBEC3C	22	39410088	39416357	1	protein_coding	27350	APOBEC3C	0.0926246	0.148303	0	0	0	NA	NA	NA	NA	Yes	IMR90	3.144e-12	rs6001872:rs112251865	23
ENSG00000243811	APOBEC3D	22	39410368	39429281	1	protein_coding	140564	APOBEC3D	2.35517e-05	0.712181	0	0	0	NA	NA	NA	NA	Yes	IMR90	3.144e-12	rs6001872:rs112251865	23
ENSG00000128394	APOBEC3F	22	39436609	39449915	1	protein_coding	200316	APOBEC3F	0.0139602	1.19567	0	0	0	NA	NA	NA	NA	Yes	IMR90	3.144e-12	rs6001872:rs112251865	23
ENSG00000239713	APOBEC3G	22	39436924	39483748	1	protein_coding	60489	APOBEC3G	1.4703e-06	-0.504701	0	0	0	NA	NA	NA	NA	Yes	IMR90	3.144e-12	rs6001872:rs112251865	23
ENSG00000118520	ARG1	6	131894284	131905472	1	protein_coding	383	ARG1	0.000499883	-0.168128	0	0	1	7.6268e-06	0.0465883	eQTLGen_trans_eQTLs	NA	No	NA	1.951e-10	rs1986649	19
ENSG00000198844	ARHGEF15	17	8213559	8225829	1	protein_coding	22899	ARHGEF15	0.00447718	0.033296	0	0	1	1.04437e-05	0.04095	GTEx/v8/Prostate	NA	No	NA	0.01389	rs17879377	21
ENSG00000150347	ARID5B	10	63661059	63856703	1	protein_coding	84159	ARID5B	0.99989	-1.13936	0	0	6	7.5599e-07	0.00644122	eQTLGen_trans_eQTLs	NA	No	NA	1.598e-12	rs2293607;rs4449583;rs7705526;rs2736100	04:07:00
ENSG00000152219	ARL14EP	11	30344598	30359774	1	protein_coding	120534	ARL14EP	0.151697	-0.308298	10	8.951	22	4.00601e-54	0	eQTLcatalogue/BLUEPRINT_ge_monocyte:eQTLcatalogue/BLUEPRINT_ge_neutrophil:eQTLcatalogue/CEDAR_B-cell_CD19:eQTLcatalogue/Fairfax_2012_B-cell_CD19:eQTLcatalogue/Fairfax_2014_IFN24:eQTLcatalogue/Fairfax_2014_LPS24:eQTLcatalogue/Fairfax_2014_LPS2:eQTLcatalogue/GENCORD_ge_LCL:eQTLcatalogue/GENCORD_ge_T-cell:eQTLcatalogue/GEUVADIS_ge_LCL:eQTLcatalogue/Nedelec_2016_ge_macrophage_Listeria:eQTLcatalogue/N…	NA	Yes	Mesenchymal_Stem_Cell	1.755e-20	rs11031006;rs11031704:rs7116279;rs11031704:rs11031731:rs61889171:rs12280757:rs11031724	12:13:00
ENSG00000182196	ARL6IP4	12	123464607	123467456	1	protein_coding	51329	ARL6IP4	0.0112342	-0.527874	5	16.51	233	1.385e-78	0	eQTLcatalogue/Fairfax_2014_IFN24:eQTLcatalogue/Fairfax_2014_LPS24:eQTLcatalogue/Fairfax_2014_naive:PsychENCODE_eQTLs:eQTLGen_cis_eQTLs:BIOSQTL/BIOS_eQTL_geneLevel:GTEx/v8/Adipose_Visceral_Omentum:GTEx/v8/Whole_Blood:GTEx/v8/Colon_Transverse:GTEx/v8/Esophagus_Mucosa:GTEx/v8/Heart_Atrial_Appendage:GTEx/v8/Lung:GTEx/v8/Pancreas:GTEx/v8/Cells_Cultured_fibroblasts:GTEx/v8/Skin_Not_Sun_Exposed_Suprapub…	NA	Yes	Promoter_anchored_loops:Spleen:GM12878:IMR90:Mesenchymal_Stem_Cell:Mesendoderm:Trophoblast-like_Cell:hESC	7.637e-09	rs641760;rs28372579;rs12820906;rs1716162;rs4930719;rs641760:rs641760;rs28372579:rs641760	17
ENSG00000161944	ASGR2	17	7004641	7019019	-1	protein_coding	433	ASGR2	6.63908e-06	0.792383	0	0	1	1.7422e-05	0.0478666	eQTLGen_cis_eQTLs	NA	No	NA	1.992e-08	rs41283405	21
ENSG00000128272	ATF4	22	39915700	39918691	1	protein_coding	468	ATF4	0.411468	-0.241367	0	0	0	NA	NA	NA	NA	Yes	Aorta:Left_Ventricle:Liver:Right_Ventricle:GM12878:IMR90:Mesenchymal_Stem_Cell:Mesendoderm:Trophoblast-like_Cell:hESC	1.037e-12	rs6001872:rs112251865	23
ENSG00000118217	ATF6	1	161736084	161933860	1	protein_coding	22926	ATF6	3.10665e-05	2.45191	0	0	1	4.5923e-06	0.0306352	eQTLGen_trans_eQTLs	NA	No	NA	6.794e-10	rs7986407;rs9532580	19
ENSG00000142102	ATHL1	11	289135	296107	1	protein_coding	80162	ATHL1	3.53242e-09	0.935514	0	0	12	1.5488e-23	0	eQTLGen_cis_eQTLs:BIOSQTL/BIOS_eQTL_geneLevel	NA	No	NA	8.251e-13	rs532483;rs12419714	11
ENSG00000149311	ATM	11	108093211	108239829	1	protein_coding	472	ATM	2.71064e-30	-0.823887	18	24	71	7.12226e-07	5.72998e-21	eQTLcatalogue/Fairfax_2014_IFN24:PsychENCODE_eQTLs:BIOSQTL/BIOS_eQTL_geneLevel:GTEx/v8/Whole_Blood:GTEx/v8/Esophagus_Muscularis	NA	Yes	Adult_Cortex:Fetal_Cortex:Aorta:Left_Ventricle:Liver:GM12878:IMR90:Mesenchymal_Stem_Cell:Mesendoderm:Trophoblast-like_Cell:hESC	2.038e-18	rs72993806;rs189426461;rs182609357;rs78142456;rs149934734;rs117706999:rs78142456:rs72993806:rs79088165	15
ENSG00000129244	ATP1B2	17	7549945	7561086	1	protein_coding	482	ATP1B2	0.179759	0.44868	1	1.564	16	9.4465e-83	0	eQTLcatalogue/Alasoo_2018_ge_macrophage_IFNg_Salmonella:eQTLcatalogue/Alasoo_2018_ge_macrophage_IFNg:PsychENCODE_eQTLs:eQTLGen_cis_eQTLs:BIOSQTL/BIOS_eQTL_geneLevel:GTEx/v8/Muscle_Skeletal:GTEx/v7/Muscle_Skeletal	NA	No	NA	3.841e-26	rs41283405;rs143094271;rs78414518;rs78378222;rs17879377;rs35850753;rs138420351	21
ENSG00000185344	ATP6V0A2	12	124196865	124246302	1	protein_coding	23545	ATP6V0A2	4.73811e-06	0.215524	0	0	0	NA	NA	NA	NA	Yes	Fetal_Cortex	4.216e-08	rs641760;rs28372579	17
ENSG00000178999	AURKB	17	8108056	8113918	-1	protein_coding	9212	AURKB	0.00588234	-0.16188	0	0	1	8.66467e-06	0.0433233	eQTLcatalogue/Kasela_2017_T-cell_CD4	NA	No	NA	3.841e-26	rs78378222	21
ENSG00000158321	AUTS2	7	69063905	70258054	1	protein_coding	26053	AUTS2	0.996187	-0.774736	0	0	5	4.3996e-14	0	eQTLGen_trans_eQTLs	NA	No	NA	7.126e-08	rs2293607	4
ENSG00000176383	B3GNT4	12	122688090	122693499	1	protein_coding	79369	B3GNT4	3.9367e-06	NA	0	0	0	NA	NA	NA	NA	Yes	Promoter_anchored_loops	7.637e-09	rs641760	17
ENSG00000182272	B4GALNT4	11	369796	382116	1	protein_coding	338707	B4GALNT4	0.81693	NA	0	0	0	NA	NA	NA	NA	Yes	Promoter_anchored_loops:IMR90:Mesenchymal_Stem_Cell	1.089e-12	rs547025:rs532483	11
ENSG00000128298	BAIAP2L2	22	38480896	38506677	-1	protein_coding	80115	BAIAP2L2	0.000100358	-0.0426661	0	0	0	NA	NA	NA	NA	Yes	Left_Ventricle	3.144e-12	rs6001872:rs112251865	23
ENSG00000176697	BDNF	11	27676440	27743605	-1	protein_coding	627	BDNF	0.946719	0.108206	0	0	0	NA	NA	NA	NA	Yes	Mesenchymal_Stem_Cell:Mesendoderm:Neural_Progenitor_Cell:Trophoblast-like_Cell:hESC	4.475e-08	rs11031006	12
ENSG00000177951	BET1L	11	167784	207428	-1	protein_coding	51272	BET1L	0.378368	1.58595	8	16.83	34	3.4203e-72	0	eQTLcatalogue/Lepik_2017_ge_blood:PsychENCODE_eQTLs:eQTLGen_cis_eQTLs:BIOSQTL/BIOS_eQTL_geneLevel:xQTLServer_eQTLs:CMC_SVA_cis:GTEx/v8/Brain_Amygdala:GTEx/v8/Brain_Anterior_cingulate_cortex_BA24:GTEx/v8/Brain_Caudate_basal_ganglia:GTEx/v8/Esophagus_Mucosa:GTEx/v8/Esophagus_Muscularis:GTEx/v7/Esophagus_Muscularis	NA	Yes	GM12878:IMR90:Mesenchymal_Stem_Cell:Trophoblast-like_Cell:hESC	4.776e-13	rs547025;rs532483;rs12419714;rs11246035;rs547025:rs532483	11
ENSG00000028310	BRD9	5	850406	892939	-1	protein_coding	65980	BRD9	0.249188	NA	0	0	0	NA	NA	NA	NA	Yes	Promoter_anchored_loops	2.256e-11	rs56023411:rs7712562	7
ENSG00000151136	BTBD11	12	107712190	108053419	1	protein_coding	121551	BTBD11	0.993433	-0.0117081	0	0	1	4.4028e-06	0.0296647	eQTLGen_trans_eQTLs	NA	No	NA	6.794e-10	rs7986407;rs9532580	19
ENSG00000185522	C11orf35	11	554855	560779	-1	protein_coding	256329	C11orf35	1.19219e-17	NA	0	0	0	NA	NA	NA	NA	Yes	Promoter_anchored_loops	1.089e-12	rs547025	11
ENSG00000166323	C11orf65	11	108179246	108338258	-1	protein_coding	160140	C11orf65	8.7813e-17	0.106835	59	23.2	74	2.1567e-11	0	PsychENCODE_eQTLs:eQTLGen_cis_eQTLs:BIOSQTL/BIOS_eQTL_geneLevel:GTEx/v8/Adrenal_Gland:GTEx/v8/Pituitary:GTEx/v8/Cells_Cultured_fibroblasts:GTEx/v8/Skin_Sun_Exposed_Lower_leg:GTEx/v8/Thyroid:GTEx/v7/Adrenal_Gland	NA	Yes	IMR90:Mesenchymal_Stem_Cell:Mesendoderm:Trophoblast-like_Cell	7.052e-19	rs72993806;rs189426461;rs182609357;rs78142456;rs111559044;rs149934734;rs72993806:rs79088165:rs78142456	15
ENSG00000185742	C11orf87	11	109292846	109299840	1	protein_coding	399947	C11orf87	0.245099	-2.0541	0	0	0	NA	NA	NA	NA	Yes	Fetal_Cortex:IMR90:Mesenchymal_Stem_Cell:Mesendoderm	1.049e-12	rs78142456:rs72993806:rs79088165	15
ENSG00000130921	C12orf65	12	123717463	123742506	1	protein_coding	91574	C12orf65	0.172329	0.226571	42	15.11	233	1.32037e-19	5.3067e-15	eQTLcatalogue/Fairfax_2014_LPS2:eQTLcatalogue/HipSci_ge_iPSC:eQTLcatalogue/Nedelec_2016_ge_macrophage_Salmonella:eQTLcatalogue/Quach_2016_ge_monocyte_R848:PsychENCODE_eQTLs:eQTLGen_cis_eQTLs:BIOSQTL/BIOS_eQTL_geneLevel:xQTLServer_eQTLs:GTEx/v8/Adipose_Subcutaneous:GTEx/v8/Adipose_Visceral_Omentum:GTEx/v8/Artery_Aorta:GTEx/v8/Artery_Tibial:GTEx/v8/Breast_Mammary_Tissue:GTEx/v8/Colon_Sigmoid:GTEx/v…	NA	Yes	EP_correlation_organ_oneway:Adult_Cortex:Fetal_Cortex:Aorta:Left_Ventricle:Liver:Lung:Pancreas:Spleen:GM12878:IMR90:Mesenchymal_Stem_Cell:Mesendoderm:Trophoblast-like_Cell:hESC	7.637e-09	rs641760;rs28372579;rs4930719;rs12820906;rs1716162;rs641760:rs641760;rs28372579:rs641760;rs12820906:rs641760;rs28372579:rs28372579	17
ENSG00000196544	C17orf59	17	8091652	8093564	-1	protein_coding	54785	C17orf59	NA	-0.989136	0	0	0	NA	NA	NA	NA	Yes	Fetal_Cortex	3.419e-07	rs17879377	21
ENSG00000262481	C17orf61-PLSCR3	17	7293053	7307416	-1	protein_coding	100529211	TMEM256-PLSCR3	NA	NA	0	0	0	NA	NA	NA	NA	Yes	Liver:IMR90:Mesenchymal_Stem_Cell	2.446e-14	rs143094271:rs17879377	21
ENSG00000173372	C1QA	1	22962999	22966101	1	protein_coding	712	C1QA	0.04979	0.221836	0	0	0	NA	NA	NA	NA	Yes	Aorta:Bladder:Left_Ventricle:Liver:Pancreas:Spleen:GM12878:IMR90:Mesenchymal_Stem_Cell:Mesendoderm:Trophoblast-like_Cell:hESC	1.655e-20	rs2235529;rs10917130:rs3765350:rs12404660:rs2235529;rs12404660:rs7521902:rs2092315	1
ENSG00000159189	C1QC	1	22970123	22974603	1	protein_coding	714	C1QC	0.0173819	0.719488	0	0	0	NA	NA	NA	NA	Yes	Adult_Cortex:Fetal_Cortex:Aorta:Bladder:Left_Ventricle:Liver:Pancreas:Spleen:GM12878:IMR90:Mesenchymal_Stem_Cell:Mesendoderm:Trophoblast-like_Cell:hESC	1.655e-20	rs2235529;rs12404660:rs41307810:rs3765350:rs2235529;rs10917130:rs12404660:rs7521902:rs2092315	1
ENSG00000150873	C2orf50	2	11273179	11286916	1	protein_coding	130813	C2orf50	0.00360225	2.37151	0	0	77	9.81539e-19	4.94349e-16	PsychENCODE_eQTLs:CMC_SVA_cis:CMC_NoSVA_cis:GTEx/v8/Brain_Frontal_Cortex_BA9	NA	Yes	Promoter_anchored_loops:Mesenchymal_Stem_Cell	1.187e-12	rs10929753;rs12994384;rs4669748;rs6728828;rs13028479;rs4668732;rs10929759;rs16857668;rs10929754;rs10929757;rs6432220;rs7570979;rs1529868;rs11679605;rs10929759:rs16857668:rs11679605:rs10929754:rs10929753	3
ENSG00000146476	C6orf211	6	151773422	151791236	1	protein_coding	79624	C6orf211	5.45635e-07	-0.451045	0	0	1	6.46353e-06	0.00673275	GTEx/v8/Pituitary	NA	Yes	Left_Ventricle:Liver:IMR90:Mesenchymal_Stem_Cell:Mesendoderm:Trophoblast-like_Cell:hESC	3.648e-32	rs584336;rs1408462:rs58415480:rs12110523:rs4870084:rs6901631:rs75730028:rs633891:rs6904757:rs13206045;rs13196107;rs35569312:rs35569312	8
ENSG00000198216	CACNA1E	1	181382238	181777219	1	protein_coding	777	CACNA1E	1	-0.119553	0	0	1	7.5628e-06	0.0462749	eQTLGen_trans_eQTLs	NA	No	NA	7.578e-10	rs9549260	19
ENSG00000138172	CALHM2	10	105206543	105212660	-1	protein_coding	51063	CALHM2	5.29268e-07	-0.689941	0	0	12	4.559e-07	0.00147613	eQTLGen_cis_eQTLs	NA	Yes	Fetal_Cortex	1.204e-09	rs7902587;rs9419958;rs7907606;rs7902587:rs9419958	10
ENSG00000183741	CBX6	22	39257455	39268319	-1	protein_coding	23466	CBX6	0.610925	1.58603	0	0	0	NA	NA	NA	NA	Yes	IMR90:Mesenchymal_Stem_Cell	3.144e-12	rs6001872:rs112251865	23
ENSG00000120051	CCDC147	10	106113522	106214848	1	protein_coding	159686	CCDC147	3.42062e-18	-0.580409	0	0	2	7.7637e-06	0.0220112	eQTLGen_cis_eQTLs	NA	Yes	EP_correlation_organ_oneway:Left_Ventricle:IMR90:Mesenchymal_Stem_Cell:Mesendoderm:Trophoblast-like_Cell:hESC	1.204e-09	rs7902587;rs7902587:rs9419958	10
ENSG00000120262	CCDC170	6	151815165	151942328	1	protein_coding	80129	CCDC170	1.02112e-19	1.38068	0	0	0	NA	NA	NA	NA	Yes	Fetal_Cortex:IMR90:Mesenchymal_Stem_Cell:Mesendoderm:Trophoblast-like_Cell:hESC	3.648e-32	rs75730028:rs633891:rs6904757:rs1408462:rs58415480:rs12110523:rs4870084:rs6901631:rs13206045;rs13196107;rs35569312:rs35569312	8
ENSG00000109881	CCDC34	11	27352374	27385415	-1	protein_coding	91057	CCDC34	4.91355e-07	-0.41837	0	0	0	NA	NA	NA	NA	Yes	IMR90	4.475e-08	rs11031006	12
ENSG00000130783	CCDC62	12	123258874	123312075	1	protein_coding	84660	CCDC62	1.43535e-12	-0.176641	0	0	209	9.03219e-07	0.000716645	PsychENCODE_eQTLs:GTEx/v8/Adipose_Visceral_Omentum:GTEx/v8/Brain_Cerebellum	NA	Yes	Adult_Cortex:Left_Ventricle:Liver:GM12878:IMR90:Mesenchymal_Stem_Cell:Mesendoderm:Trophoblast-like_Cell:hESC	7.637e-09	rs641760;rs4930719;rs28372579;rs12820906;rs641760:rs641760;rs28372579:rs641760;rs12820906:rs641760	17
ENSG00000119242	CCDC92	12	124403207	124457378	-1	protein_coding	80212	CCDC92	0.36885	NA	0	0	0	NA	NA	NA	NA	Yes	Adult_Cortex:Trophoblast-like_Cell:hESC	9.546e-09	rs641760;rs4930719;rs28372579:rs641760:rs641760;rs28372579;rs12820906:rs641760	17
ENSG00000183625	CCR3	3	46205096	46308197	1	protein_coding	1232	CCR3	0.0318931	-0.541029	0	0	4	6.0675e-08	0.000805571	eQTLGen_trans_eQTLs	NA	No	NA	1.951e-10	rs7110547;rs1986649;rs7986407;rs9532580;rs9549260	13:19:00
ENSG00000026508	CD44	11	35160417	35253949	1	protein_coding	960	CD44	0.00826938	-0.278094	0	0	36	3.5928e-29	6.86389e-24	eQTLcatalogue/Quach_2016_ge_monocyte_LPS:eQTLcatalogue/Quach_2016_ge_monocyte_Pam3CSK4:eQTLGen_cis_eQTLs:GTEx/v8/Adipose_Subcutaneous:GTEx/v8/Artery_Aorta:GTEx/v8/Artery_Tibial:GTEx/v8/Muscle_Skeletal:GTEx/v8/Nerve_Tibial:GTEx/v7/Adipose_Subcutaneous:GTEx/v7/Artery_Aorta:GTEx/v7/Artery_Tibial:GTEx/v7/Muscle_Skeletal:GTEx/v7/Nerve_Tibial:GTEx/v6/Artery_Tibial:GTEx/v6/Nerve_Tibial	NA	Yes	Adult_Cortex:Aorta:Bladder:Left_Ventricle:Liver:Pancreas:Psoas:Right_Ventricle:Spleen:GM12878:IMR90:Mesenchymal_Stem_Cell:Mesendoderm:Neural_Progenitor_Cell:Trophoblast-like_Cell:hESC	1.198e-08	rs2553772	14
ENSG00000085063	CD59	11	33719807	33757991	-1	protein_coding	966	CD59	0.0683809	0.475806	0	0	0	NA	NA	NA	NA	Yes	Mesenchymal_Stem_Cell	1.755e-20	rs11031704:rs7116279;rs11031704:rs11031731:rs61889171:rs12280757:rs11031724	13
ENSG00000129226	CD68	17	7482785	7485429	1	protein_coding	968	CD68	0.000599774	0.428807	2	8.828	15	1.7385e-21	0	eQTLcatalogue/Fairfax_2014_naive:eQTLGen_cis_eQTLs	NA	Yes	Hippocampus:GM12878:IMR90:Mesenchymal_Stem_Cell:Mesendoderm:hESC	3.841e-26	rs78414518;rs41283405;rs17879377;rs143094271;rs78378222;rs35850753	21
ENSG00000125726	CD70	19	6583194	6604114	-1	protein_coding	970	CD70	0.0457522	-0.0751305	0	0	1	7.3745e-08	0.000898123	eQTLGen_trans_eQTLs	NA	No	NA	3.841e-26	rs78378222	21
ENSG00000070831	CDC42	1	22379120	22419437	1	protein_coding	998	CDC42	0.656574	-0.512764	11	6.336	62	3.27170000000001e-310	0	eQTLcatalogue/BLUEPRINT_ge_neutrophil:eQTLcatalogue/Fairfax_2012_B-cell_CD19:eQTLcatalogue/Fairfax_2014_naive:eQTLcatalogue/Lepik_2017_ge_blood:scRNA_eQTLs/T_CD4:scRNA_eQTLs/PBMC:eQTLGen_cis_eQTLs:BIOSQTL/BIOS_eQTL_geneLevel:GTEx/v8/Artery_Aorta:GTEx/v8/Artery_Tibial:GTEx/v8/Colon_Sigmoid:GTEx/v8/Colon_Transverse:GTEx/v8/Esophagus_Mucosa:GTEx/v8/Muscle_Skeletal:GTEx/v8/Cells_Cultured_fibroblasts:…	NA	Yes	Promoter_anchored_loops:Adult_Cortex:Fetal_Cortex:Left_Ventricle:GM12878:IMR90:Mesenchymal_Stem_Cell:Mesendoderm:Trophoblast-like_Cell:hESC	7.388e-21	rs10917130;rs2235529;rs2473290;rs12404660;rs10799737;rs7519889;rs41307810;rs3765350;rs12410251;rs3971300;rs72478520;rs7521902;rs2092315;rs10917130:rs41307810:rs3765350:rs2235529;rs12404660:rs2235529	1
ENSG00000144354	CDCA7	2	174219548	174233725	1	protein_coding	83879	CDCA7	0.141955	0.582754	0	0	5	1.3508e-12	0	eQTLGen_trans_eQTLs	NA	No	NA	7.126e-08	rs2293607	4
ENSG00000170558	CDH2	18	25530930	25757410	-1	protein_coding	1000	CDH2	0.897441	-0.139326	0	0	1	4.0329e-07	0.00356479	eQTLGen_trans_eQTLs	NA	No	NA	6.794e-10	rs7986407;rs9532580	19
ENSG00000099834	CDHR5	11	616565	626078	-1	protein_coding	53841	CDHR5	1.31307e-10	0.549306	0	0	4	4.86762e-05	1.18527e-12	GTEx/v8/Testis	NA	No	NA	1.089e-12	rs547025	11
ENSG00000111328	CDK2AP1	12	123745528	123756881	-1	protein_coding	8099	CDK2AP1	0.742361	NA	16	14.16	233	3.0597e-116	0	eQTLcatalogue/BLUEPRINT_ge_monocyte:eQTLcatalogue/BLUEPRINT_ge_neutrophil:eQTLcatalogue/BLUEPRINT_ge_T-cell:eQTLcatalogue/GENCORD_ge_fibroblast:eQTLcatalogue/GENCORD_ge_LCL:eQTLcatalogue/GENCORD_ge_T-cell:eQTLcatalogue/GEUVADIS_ge_LCL:eQTLcatalogue/HipSci_ge_iPSC:eQTLcatalogue/Nedelec_2016_ge_macrophage_Salmonella:eQTLcatalogue/Quach_2016_ge_monocyte_naive:eQTLcatalogue/TwinsUK_ge_fat:eQTLcatalog…	NA	Yes	Promoter_anchored_loops:Fetal_Cortex:Aorta:Left_Ventricle:Liver:Spleen:GM12878:IMR90:Mesenchymal_Stem_Cell:Mesendoderm:Trophoblast-like_Cell:hESC	7.637e-09	rs641760;rs4930719;rs28372579;rs12820906;rs1716162;rs28372579:rs641760;rs28372579:rs641760:rs641760	17
ENSG00000142789	CELA3A	1	22328149	22339032	1	protein_coding	10136	CELA3A	9.82225e-08	1.79603	2	6.103	0	NA	NA	NA	NA	No	NA	3.041e-15	rs10917130	1
ENSG00000219073	CELA3B	1	22303514	22325135	1	protein_coding	23436	CELA3B	2.11744e-10	0.246016	0	0	0	NA	NA	NA	NA	Yes	GM12878	6.988e-16	rs10917130:rs41307810:rs3765350	1
ENSG00000000971	CFH	1	196621008	196716634	1	protein_coding	3075	CFH	0.999631	0.906065	0	0	5	1.4178e-18	0	eQTLGen_trans_eQTLs	NA	No	NA	7.126e-08	rs2293607	4
ENSG00000170004	CHD3	17	7788124	7816078	1	protein_coding	1107	CHD3	1	-0.359996	0	0	0	NA	NA	NA	NA	Yes	Adult_Cortex:Fetal_Cortex:IMR90	3.419e-07	rs17879377	21
ENSG00000177200	CHD9	16	53088945	53363062	1	protein_coding	80205	CHD9	1	-0.715493	0	0	0	NA	NA	NA	NA	Yes	IMR90:Mesendoderm	2.816e-07	rs66998222	20
ENSG00000109220	CHIC2	4	54875956	54930857	-1	protein_coding	26511	CHIC2	0.344124	NA	0	0	0	NA	NA	NA	NA	Yes	Adult_Cortex:Fetal_Cortex:IMR90:Mesenchymal_Stem_Cell:Mesendoderm:Trophoblast-like_Cell:hESC	6.568e-14	rs67751869:rs55732414:rs4864806;rs62323678:rs62323678:rs4864806:rs66604018	5
ENSG00000170175	CHRNB1	17	7348380	7361026	1	protein_coding	1140	CHRNB1	4.3363e-06	-0.37326	0	0	9	1.88833e-07	2.35418e-33	PsychENCODE_eQTLs:eQTLGen_cis_eQTLs:GTEx/v8/Testis:GTEx/v7/Testis	NA	Yes	Fetal_Cortex:IMR90	2.446e-14	rs78414518;rs41283405;rs17879377;rs17879377:rs143094271	21
ENSG00000181885	CLDN7	17	7163222	7167302	-1	protein_coding	1366	CLDN7	0.0413847	-0.772028	0	0	2	2.112e-06	9.79735e-07	eQTLGen_cis_eQTLs:GTEx/v8/Heart_Atrial_Appendage	NA	No	NA	3.841e-26	rs78378222;rs35850753	21
ENSG00000166527	CLEC4D	12	8662071	8674962	1	protein_coding	338339	CLEC4D	0.000109415	2.10455	0	0	2	8.1039e-08	0.00102339	eQTLGen_trans_eQTLs	NA	No	NA	1.951e-10	rs1986649;rs7986407;rs9532580	19
ENSG00000166523	CLEC4E	12	8685901	8693559	-1	protein_coding	26253	CLEC4E	0.00355803	0.573692	0	0	1	1.4313e-06	0.0112294	eQTLGen_trans_eQTLs	NA	No	NA	6.794e-10	rs7986407;rs9532580	19
ENSG00000130779	CLIP1	12	122755979	122907179	-1	protein_coding	6249	CLIP1	0.968496	0.285418	0	0	0	NA	NA	NA	NA	Yes	Adult_Cortex:Fetal_Cortex	4.216e-08	rs641760;rs28372579	17
ENSG00000205423	CNEP1R1	16	50058321	50070999	1	protein_coding	255919	CNEP1R1	0.291176	-0.0780849	0	0	0	NA	NA	NA	NA	Yes	IMR90	2.816e-07	rs66998222	20
ENSG00000170037	CNTROB	17	7835419	7853236	1	protein_coding	116840	CNTROB	1.23733e-11	0.194206	0	0	0	NA	NA	NA	NA	Yes	Fetal_Cortex:Liver:GM12878:IMR90:Mesenchymal_Stem_Cell	1.438e-07	rs17879377:rs78414518	21
ENSG00000133103	COG6	13	40229764	40365802	1	protein_coding	57511	COG6	6.72063e-10	0.102601	0	0	0	NA	NA	NA	NA	Yes	Adult_Cortex:Aorta:Left_Ventricle:Liver:GM12878:IMR90:Mesenchymal_Stem_Cell:Mesendoderm:Trophoblast-like_Cell:hESC	1.185e-11	rs1986649:rs7986407:rs7986407;rs9532583:rs9549260:rs9532583:rs2297014:rs9532583;rs9532585:rs7986407;rs9532580:rs117245733:rs61963209	18:19:00
ENSG00000110442	COMMD9	11	36295051	36310999	-1	protein_coding	29099	COMMD9	0.63526	-0.0553686	0	0	0	NA	NA	NA	NA	Yes	Left_Ventricle:IMR90:Mesenchymal_Stem_Cell	1.198e-08	rs2553772	14
ENSG00000131143	COX4I1	16	85832239	85840650	1	protein_coding	1327	COX4I1	0.722238	NA	0	0	3	1.3315e-06	0.0105141	eQTLGen_trans_eQTLs	NA	No	NA	3.416e-08	rs641760;rs4930719;rs28372579	17
ENSG00000088766	CRLS1	20	5986736	6020699	1	protein_coding	54675	CRLS1	0.0335081	-0.57532	0	0	1	1.4052e-18	0	eQTLGen_cis_eQTLs	NA	No	NA	2.826e-08	rs16991615	22
ENSG00000126545	CSN1S1	4	70796799	70812289	1	protein_coding	1446	CSN1S1	8.30013e-06	0.0970831	0	0	43	2.16162e-13	0	BIOSQTL/BIOS_eQTL_geneLevel:GTEx/v6/Whole_Blood	NA	No	NA	3.826e-10	rs4694227;rs12640488	6
ENSG00000176102	CSTF3	11	33098734	33183917	-1	protein_coding	1479	CSTF3	0.996434	0.320263	0	0	1	0.00013316	0.00808685	GTEx/v8/Whole_Blood	NA	No	NA	5.699e-15	rs11031726	13
ENSG00000178971	CTC1	17	8130191	8151362	-1	protein_coding	80169	CTC1	3.51223e-07	NA	0	0	0	NA	NA	NA	NA	Yes	Fetal_Cortex	3.419e-07	rs17879377	21
ENSG00000196188	CTSE	1	206317459	206332104	1	protein_coding	1510	CTSE	4.86867e-07	1.11074	0	0	2	5.8761e-06	0.0377391	eQTLGen_trans_eQTLs	NA	No	NA	1.849e-10	rs4449583;rs7705526	7
ENSG00000100448	CTSG	14	25042728	25045466	-1	protein_coding	1511	CTSG	0.202073	0.435366	0	0	2	2.0582e-07	0.00202116	eQTLGen_trans_eQTLs	NA	No	NA	1.951e-10	rs1986649;rs9549260	19
ENSG00000166266	CUL5	11	107879459	107978503	1	protein_coding	8065	CUL5	0.999965	0.0584064	4	8.966	78	7.4722e-125	0	eQTLcatalogue/CEDAR_transverse_colon:eQTLcatalogue/Fairfax_2012_B-cell_CD19:eQTLcatalogue/Fairfax_2014_IFN24:eQTLcatalogue/Fairfax_2014_LPS24:eQTLcatalogue/Fairfax_2014_LPS2:eQTLcatalogue/Fairfax_2014_naive:eQTLcatalogue/Kasela_2017_T-cell_CD4:eQTLcatalogue/Kasela_2017_T-cell_CD8:PsychENCODE_eQTLs:eQTLGen_cis_eQTLs	NA	Yes	GM12878:IMR90:Mesenchymal_Stem_Cell:Mesendoderm:Trophoblast-like_Cell:hESC	1.522e-15	rs189426461;rs182609357;rs78142456;rs71488291;rs72993806;rs111559044;rs72993806:rs79088165:rs78142456	15
ENSG00000182224	CYB5D1	17	7761064	7765600	1	protein_coding	124637	CYB5D1	4.5752e-05	-1.96605	0	0	4	1.8923e-06	0.00553326	eQTLGen_cis_eQTLs	NA	Yes	IMR90	1.281e-08	rs17879377	21
ENSG00000071967	CYBRD1	2	172378757	172414643	1	protein_coding	79901	CYBRD1	0.351788	2.29122	0	0	2	8.3076e-07	0.00702644	eQTLGen_trans_eQTLs	NA	No	NA	6.794e-10	rs7986407;rs9532580;rs9549260	19
ENSG00000083799	CYLD	16	50775961	50835846	1	protein_coding	1540	CYLD	0.99472	-1.96431	0	0	0	NA	NA	NA	NA	Yes	IMR90:Mesenchymal_Stem_Cell:hESC	2.816e-07	rs66998222	20
ENSG00000165617	DACT1	14	59100685	59115039	1	protein_coding	51339	DACT1	0.816598	NA	0	0	1	7.822e-06	0.0475588	eQTLGen_trans_eQTLs	NA	No	NA	1.016e-07	rs2293607	4
ENSG00000170959	DCDC1	11	30851916	31391357	-1	protein_coding	341019	DCDC1	9.13495e-05	-0.825531	0	0	0	NA	NA	NA	NA	Yes	Adult_Cortex:Fetal_Cortex:IMR90:Mesenchymal_Stem_Cell	1.755e-20	rs7116279:rs7110547:rs11031783:rs11031704:rs7116279;rs11031704:rs11031731:rs61889171:rs12280757:rs11031724:rs11031006	12:13:00
ENSG00000178105	DDX10	11	108535752	108811657	1	protein_coding	1662	DDX10	5.41643e-11	0.226678	0	0	0	NA	NA	NA	NA	Yes	Promoter_anchored_loops:GM12878:Mesenchymal_Stem_Cell:Mesendoderm:hESC	2.641e-12	rs72993806	15
ENSG00000111364	DDX55	12	124086624	124105488	1	protein_coding	57696	DDX55	6.00816e-06	1.21512	0	0	0	NA	NA	NA	NA	Yes	Promoter_anchored_loops:Adult_Cortex:Fetal_Cortex:Left_Ventricle:Liver:Spleen:GM12878:IMR90:Mesenchymal_Stem_Cell:Mesendoderm:Trophoblast-like_Cell:hESC	9.546e-09	rs641760;rs28372579;rs12820906:rs641760;rs4930719;rs28372579:rs641760;rs28372579:rs28372579:rs641760:rs4930719;rs28372579:rs4930719	17
ENSG00000139726	DENR	12	123237321	123255611	1	protein_coding	8562	DENR	0.846253	-0.665629	0	0	18	0.000123391	0.00469026	GTEx/v8/Brain_Cerebellum	NA	Yes	Promoter_anchored_loops:Fetal_Cortex:Mesenchymal_Stem_Cell	2.963e-08	rs641760;rs28372579	17
ENSG00000121690	DEPDC7	11	33037410	33055128	1	protein_coding	91614	DEPDC7	1.25057e-05	0.0693093	0	0	1	NA	0.049	CMC_SVA_cis	NA	No	NA	5.408e-10	rs3920533	13
ENSG00000102780	DGKH	13	42614176	42830714	1	protein_coding	160851	DGKH	0.818124	NA	0	0	0	NA	NA	NA	NA	Yes	IMR90	4.48e-07	rs61963209	19
ENSG00000073737	DHRS9	2	169921299	169952677	1	protein_coding	10170	DHRS9	2.60804e-07	0.131292	0	0	3	9.0914e-12	0	eQTLGen_trans_eQTLs	NA	No	NA	1.951e-10	rs1986649;rs7986407;rs9532580;rs9549260	19
ENSG00000184047	DIABLO	12	122692210	122712081	-1	protein_coding	56616	DIABLO	0.000889965	-0.268036	0	0	1	1.8241e-05	0.0497852	eQTLGen_cis_eQTLs	NA	No	NA	1.838e-08	rs641760;rs28372579	17
ENSG00000137090	DMRT1	9	841690	969090	1	protein_coding	1761	DMRT1	0.683593	-0.489715	11	7.506	0	NA	NA	NA	NA	Yes	Mesenchymal_Stem_Cell:Mesendoderm:hESC	9.004e-13	rs2277163;rs10739107:rs138821078:rs10975803:rs34800401:rs10115078:rs7036783:rs1812266	9
ENSG00000197653	DNAH10	12	124247042	124420753	1	protein_coding	196385	DNAH10	4.14032e-37	-0.520605	0	0	3	8.88872e-06	0.0156982	GTEx/v6/Brain_Cerebellum	NA	No	NA	4.431e-08	rs641760;rs28372579	17
ENSG00000183914	DNAH2	17	7620672	7737062	1	protein_coding	146754	DNAH2	2.48852e-21	0.332994	1	0.088	0	NA	NA	NA	NA	No	NA	6.833e-17	rs138420351	21
ENSG00000170946	DNAJC24	11	31391387	31453396	1	protein_coding	120526	DNAJC24	7.24727e-07	-1.03812	0	0	0	NA	NA	NA	NA	Yes	Adult_Cortex:Fetal_Cortex:IMR90:Mesenchymal_Stem_Cell	1.755e-20	rs7116279:rs7110547:rs11031783:rs11031704:rs7116279;rs11031704:rs11031731:rs61889171:rs12280757:rs11031724:rs11031006	12:13:00
ENSG00000100246	DNAL4	22	39174513	39190203	-1	protein_coding	10126	DNAL4	0.323422	-0.725365	0	0	0	NA	NA	NA	NA	Yes	Mesenchymal_Stem_Cell	3.144e-12	rs6001872:rs112251865	23
ENSG00000197959	DNM3	1	171810621	172387606	1	protein_coding	26052	DNM3	0.028277	-0.434631	3	1.884	0	NA	NA	NA	NA	No	NA	2.763e-08	rs59760198	2
ENSG00000004975	DVL2	17	7128660	7137864	-1	protein_coding	1856	DVL2	0.0113615	-0.0352039	0	0	0	NA	NA	NA	NA	Yes	Fetal_Cortex	3.419e-07	rs17879377	21
ENSG00000007968	E2F2	1	23832922	23857712	-1	protein_coding	1870	E2F2	0.914703	-0.0343112	0	0	0	NA	NA	NA	NA	Yes	IMR90	1.655e-20	rs2235529;rs10917130	1
ENSG00000169016	E2F6	2	11584501	11606297	-1	protein_coding	1876	E2F6	0.554509	-0.985957	0	0	1	3.68076e-05	0.04378	GTEx/v8/Breast_Mammary_Tissue	NA	Yes	IMR90:Mesenchymal_Stem_Cell	4.557e-10	rs10929753;rs10929754:rs10929753:rs10929759:rs16857668:rs11679605	3
ENSG00000117298	ECE1	1	21543740	21671997	-1	protein_coding	1889	ECE1	0.999769	NA	0	0	0	NA	NA	NA	NA	Yes	Fetal_Cortex:Mesenchymal_Stem_Cell	1.655e-20	rs41307810:rs3765350:rs2235529;rs10917130	1
ENSG00000121310	ECHDC2	1	53361656	53392884	-1	protein_coding	55268	ECHDC2	1.18082e-07	0.192219	0	0	1	6.3556e-06	0.0401807	eQTLGen_trans_eQTLs	NA	No	NA	6.794e-10	rs7986407;rs9532580	19
ENSG00000135373	EHF	11	34642640	34682604	1	protein_coding	26298	EHF	0.978731	0.378436	0	0	0	NA	NA	NA	NA	Yes	GM12878:IMR90:Mesendoderm:Trophoblast-like_Cell:hESC	1.198e-08	rs2553772	14
ENSG00000111361	EIF2B1	12	124104953	124118313	-1	protein_coding	1967	EIF2B1	0.104796	1.41411	0	0	217	4.0311e-21	0	eQTLGen_cis_eQTLs	NA	Yes	Fetal_Cortex:Left_Ventricle:Liver:Spleen:GM12878:IMR90:Mesenchymal_Stem_Cell:Mesendoderm:Trophoblast-like_Cell:hESC	7.637e-09	rs641760;rs28372579;rs12820906;rs1716162;rs4930719;rs28372579:rs641760:rs641760;rs12820906:rs641760;rs28372579:rs28372579:rs4930719;rs28372579:rs4930719	17
ENSG00000100353	EIF3D	22	36906897	36925483	-1	protein_coding	8664	EIF3D	0.994222	-0.349167	0	0	4	1.3533e-08	0.000190114	eQTLGen_trans_eQTLs	NA	No	NA	1.555e-08	rs641760;rs28372579;rs4930719	17
ENSG00000149100	EIF3M	11	32605344	32627808	1	protein_coding	10480	EIF3M	0.981661	0.0967695	0	0	23	2.86411e-07	0.00143206	eQTLcatalogue/BLUEPRINT_ge_neutrophil	NA	Yes	Adult_Cortex:Fetal_Cortex:Left_Ventricle:GM12878:IMR90:Mesenchymal_Stem_Cell:Mesendoderm:Neural_Progenitor_Cell:Trophoblast-like_Cell:hESC	2.035e-21	rs7105538;rs56911719;rs6484574;rs12574749;rs11031751;rs12270749;rs7116279:rs7110547:rs11031783:rs11031006:rs11031704:rs7116279;rs11031704:rs11031731:rs61889171:rs12280757:rs11031724:rs11031726:rs11031724;rs11031726:rs11031736:rs11031737:rs56911719:rs6484574;rs11031751:rs6484574;rs12574749:rs28460016:rs10835904:rs6484574;rs3858445:rs3858445:rs12270749	12:13:00
ENSG00000161960	EIF4A1	17	7476024	7482323	1	protein_coding	1973	EIF4A1	0.999614	-0.471968	1	1.487	11	1.49391e-19	0	BIOSQTL/BIOS_eQTL_geneLevel	NA	Yes	Adult_Cortex:Fetal_Cortex	1.281e-08	rs78414518;rs41283405;rs17879377	21
ENSG00000132507	EIF5A	17	7210318	7215774	1	protein_coding	1984	EIF5A	0.890877	1.20813	0	0	0	NA	NA	NA	NA	Yes	Fetal_Cortex:GM12878:IMR90	2.446e-14	rs17879377:rs78414518:rs143094271	21
ENSG00000120690	ELF1	13	41506056	41635576	-1	protein_coding	1997	ELF1	0.54778	-0.476383	2	8.399	56	1.3865e-14	0	eQTLGen_cis_eQTLs	NA	Yes	Aorta:Left_Ventricle:Liver:Spleen:GM12878:IMR90:Mesenchymal_Stem_Cell:Mesendoderm:Trophoblast-like_Cell:hESC	1.066e-11	rs61963209;rs1986649;rs7986407;rs9532583;rs9549260;rs2297014;rs9532585;rs9566605;rs61963209:rs7986407;rs9532583:rs1986649:rs9549260:rs9532583:rs2297014:rs9532583	19
ENSG00000110675	ELMOD1	11	107461817	107537505	1	protein_coding	55531	ELMOD1	0.536338	-0.331573	0	0	0	NA	NA	NA	NA	Yes	IMR90:Mesenchymal_Stem_Cell	1.049e-12	rs79088165:rs78142456	15
ENSG00000118402	ELOVL4	6	80624529	80657297	-1	protein_coding	6785	ELOVL4	0.741051	0.380942	0	0	5	1.378e-11	0	eQTLGen_trans_eQTLs	NA	No	NA	7.126e-08	rs2293607	4
ENSG00000109911	ELP4	11	31531297	31805546	1	protein_coding	26610	ELP4	0.0125583	-0.412136	0	0	0	NA	NA	NA	NA	Yes	Fetal_Cortex:IMR90:Mesenchymal_Stem_Cell:Mesendoderm	1.755e-20	rs7110547:rs11031783:rs11031704:rs7116279;rs11031704:rs11031731:rs61889171:rs12280757:rs11031724	13
ENSG00000070886	EPHA8	1	22890057	22930087	1	protein_coding	2046	EPHA8	1.13671e-08	0.679092	0	0	0	NA	NA	NA	NA	Yes	IMR90:Mesenchymal_Stem_Cell:Mesendoderm:Trophoblast-like_Cell	1.655e-20	rs2235529;rs10917130	1
ENSG00000133216	EPHB2	1	23037332	23241818	1	protein_coding	2048	EPHB2	0.999949	-0.362526	0	0	0	NA	NA	NA	NA	Yes	IMR90:Mesenchymal_Stem_Cell:Trophoblast-like_Cell	1.655e-20	rs2235529;rs10917130	1
ENSG00000226887	ERVMER34-1	4	53588785	53617807	-1	protein_coding	100288413	ERVMER34-1	NA	NA	0	0	13	1.69115e-05	0.0113032	GTEx/v8/Adipose_Subcutaneous	NA	No	NA	6.568e-14	rs4864806;rs62323678	5
ENSG00000110723	EXPH5	11	108376158	108464465	-1	protein_coding	23086	EXPH5	5.76468e-21	-0.698487	11	9.278	36	4.6232e-06	0.00674269	eQTLGen_cis_eQTLs:GTEx/v8/Brain_Frontal_Cortex_BA9:GTEx/v8/Pancreas	NA	Yes	Adult_Cortex:Fetal_Cortex:Aorta:Left_Ventricle:Liver:GM12878:IMR90:Mesenchymal_Stem_Cell:Mesendoderm:Neural_Progenitor_Cell:Trophoblast-like_Cell:hESC	3.013e-18	rs79088165;rs117706999;rs78142456;rs72993806;rs149934734;rs117706999:rs78142456:rs79088165:rs72993806	15
ENSG00000124491	F13A1	6	6144318	6321246	-1	protein_coding	2162	F13A1	0.00102736	0.8944	0	0	1	2.9904e-08	0.000381455	eQTLGen_trans_eQTLs	NA	No	NA	2.551e-08	rs2853677	7
ENSG00000178882	FAM101A	12	124457788	124800570	1	protein_coding	144347	FAM101A	0.212634	0.253239	0	0	0	NA	NA	NA	NA	Yes	Adult_Cortex:Trophoblast-like_Cell:hESC	9.546e-09	rs641760;rs4930719;rs28372579:rs641760:rs641760;rs28372579;rs12820906:rs641760	17
ENSG00000133477	FAM83F	22	40390953	40439533	1	protein_coding	113828	FAM83F	0.000400741	NA	0	0	12	5.42477e-05	0.0153211	GTEx/v8/Heart_Atrial_Appendage	NA	Yes	EP_correlation_cell_type_oneway:Left_Ventricle:GM12878:IMR90:Mesenchymal_Stem_Cell:Mesendoderm:Trophoblast-like_Cell:hESC	1.031e-12	rs112251865;rs6001872:rs112251865	23
ENSG00000179639	FCER1A	1	159259504	159278014	1	protein_coding	2205	FCER1A	0.00255803	0.100804	0	0	3	5.6239e-16	0	eQTLGen_trans_eQTLs	NA	No	NA	1.951e-10	rs1986649;rs7986407;rs9532580;rs9549260	19
ENSG00000137714	FDX1	11	110300607	110335605	1	protein_coding	2230	FDX1	0.0839816	0.550822	0	0	0	NA	NA	NA	NA	Yes	IMR90	1.049e-12	rs72993806:rs79088165:rs78142456	15
ENSG00000161958	FGF11	17	7341592	7348256	1	protein_coding	2256	FGF11	0.0681958	-0.0904517	0	0	8	9.50685e-06	4.05868e-09	GTEx/v8/Thyroid	NA	Yes	Adult_Cortex:Fetal_Cortex:IMR90	2.446e-14	rs41283405;rs17879377;rs17879377:rs143094271	21
ENSG00000145216	FIP1L1	4	54243810	55161439	1	protein_coding	81608	FIP1L1	0.60079	-0.155882	25	11.73	0	NA	NA	NA	NA	Yes	Adult_Cortex:Fetal_Cortex:Left_Ventricle:Liver:IMR90:Mesenchymal_Stem_Cell:Mesendoderm:hESC	5.947e-14	rs62325482;rs55732414;rs4864806;rs62323678;rs66604018;rs67751869;rs4864806:rs66604018:rs67751869:rs55732414:rs4864806;rs62323678:rs62323678	5
ENSG00000150907	FOXO1	13	41129804	41240734	-1	protein_coding	2308	FOXO1	0.96638	-1.01598	129	15.99	215	3.0284e-12	0	PsychENCODE_eQTLs:eQTLGen_cis_eQTLs:BIOSQTL/BIOS_eQTL_geneLevel:GTEx/v8/Brain_Cerebellar_Hemisphere	NA	Yes	Adult_Cortex:Aorta:Bladder:Hippocampus:Left_Ventricle:Liver:Lung:Pancreas:Psoas:Right_Ventricle:Spleen:GM12878:IMR90:Mesenchymal_Stem_Cell:Mesendoderm:Neural_Progenitor_Cell:Trophoblast-like_Cell:hESC	1.066e-11	rs7986407;rs1986649;rs9532580;rs9532583;rs9532585;rs9549260;rs2297014;rs9549296;rs61963209;rs1986649:rs7986407:rs7986407;rs9532580:rs117245733:rs2297014:rs9532583;rs9532585:rs7986407;rs9532583:rs9549260:rs9532583:rs61963209	18:19:00
ENSG00000171049	FPR2	19	52255279	52273779	1	protein_coding	2358	FPR2	0.0191753	0.824389	0	0	2	3.2353e-07	0.00294349	eQTLGen_trans_eQTLs	NA	No	NA	1.951e-10	rs1986649;rs9549260	19
ENSG00000073910	FRY	13	32605437	32870794	1	protein_coding	10129	FRY	1	-1.58535	0	0	2	5.0238e-07	0.00441865	eQTLGen_trans_eQTLs	NA	No	NA	1.951e-10	rs1986649;rs9549260	19
ENSG00000129245	FXR2	17	7494548	7518189	-1	protein_coding	9513	FXR2	0.99977	NA	1	8.828	0	NA	NA	NA	NA	Yes	Adult_Cortex:Fetal_Cortex:Hippocampus:GM12878:IMR90:Mesenchymal_Stem_Cell:Mesendoderm:hESC	2.446e-14	rs78414518;rs143094271:rs78414518:rs17879377	21
ENSG00000179348	GATA2	3	128198270	128212028	-1	protein_coding	2624	GATA2	0.979762	-0.230415	0	0	1	4.2209e-06	0.0287382	eQTLGen_trans_eQTLs	NA	No	NA	7.578e-10	rs9549260	19
ENSG00000122694	GLIPR2	9	36136732	36163910	1	protein_coding	152007	GLIPR2	0.000501677	0.56443	0	0	1	7.6698e-06	0.0468228	eQTLGen_trans_eQTLs	NA	No	NA	6.794e-10	rs7986407;rs9532580	19
ENSG00000173905	GOLIM4	3	167726465	167813763	-1	protein_coding	27333	GOLIM4	5.53788e-11	-0.471442	0	0	0	NA	NA	NA	NA	Yes	IMR90	1.016e-07	rs2293607	4
ENSG00000173890	GPR160	3	169755717	169803191	1	protein_coding	26996	GPR160	0.00375672	-0.2635	0	0	30	2.0249e-09	1.95707e-05	eQTLGen_cis_eQTLs	NA	No	NA	4.061e-08	rs2293607	4
ENSG00000250510	GPR162	12	6930711	6939136	1	protein_coding	27239	GPR162	0.0171344	NA	0	0	1	1.9943e-06	0.0153458	eQTLGen_trans_eQTLs	NA	No	NA	6.794e-10	rs7986407;rs9532580	19
ENSG00000100351	GRAP2	22	40297086	40369725	1	protein_coding	9402	GRAP2	0.101872	-1.34926	0	0	16	3.342e-06	0.000117328	eQTLGen_cis_eQTLs:GTEx/v8/Heart_Left_Ventricle	NA	Yes	EP_correlation_cell_type_oneway:IMR90:Mesenchymal_Stem_Cell:Mesendoderm:Trophoblast-like_Cell:hESC	1.037e-12	rs6001872;rs6001872:rs112251865	23
ENSG00000196208	GREB1	2	11674242	11782914	1	protein_coding	9687	GREB1	0.0254855	2.28795	90	14.54	84	1.91228e-12	5.33487e-08	eQTLcatalogue/BrainSeq_ge_brain:PsychENCODE_eQTLs:eQTLGen_cis_eQTLs:BIOSQTL/BIOS_eQTL_geneLevel:xQTLServer_eQTLs:CMC_SVA_cis:GTEx/v8/Minor_Salivary_Gland:GTEx/v7/Muscle_Skeletal	NA	No	NA	1.187e-12	rs10929754;rs10929753;rs12994384;rs4669748;rs974163;rs6728828;rs10929757;rs4668732;rs6432220;rs13028479;rs7570979;rs1529868;rs10929759;rs16857668;rs11679605	3
ENSG00000148834	GSTO1	10	105995114	106027217	1	protein_coding	9446	GSTO1	0.0150378	0.556924	0	0	28	7.2307e-13	0	eQTLGen_cis_eQTLs:GTEx/v8/Breast_Mammary_Tissue:GTEx/v8/Skin_Not_Sun_Exposed_Suprapubic:GTEx/v8/Stomach	NA	No	NA	1.204e-09	rs7902587;rs9419958;rs7907606	10
ENSG00000065621	GSTO2	10	106028631	106064703	1	protein_coding	119391	GSTO2	1.66971e-07	0.0298912	0	0	25	4.28117e-06	1.6003e-80	PsychENCODE_eQTLs:CMC_SVA_cis:CMC_NoSVA_cis:GTEx/v8/Skin_Sun_Exposed_Lower_leg:GTEx/v6/Spleen	NA	Yes	Adult_Cortex:Fetal_Cortex:Aorta:Dorsolateral_Prefrontal_Cortex:Hippocampus:Left_Ventricle:Liver:Right_Ventricle:GM12878:IMR90:Mesenchymal_Stem_Cell:Mesendoderm:Neural_Progenitor_Cell:Trophoblast-like_Cell:hESC	1.204e-09	rs7907606;rs7902587;rs9419958;rs7902587:rs9419958	10
ENSG00000180613	GSX2	4	54965690	54968672	1	protein_coding	170825	GSX2	0.148701	-0.521378	0	0	0	NA	NA	NA	NA	Yes	Left_Ventricle:IMR90:Mesenchymal_Stem_Cell:Trophoblast-like_Cell:hESC	6.568e-14	rs55732414:rs4864806;rs62323678:rs62323678:rs4864806:rs66604018:rs67751869	5
ENSG00000111358	GTF2H3	12	124118375	124147153	1	protein_coding	2967	GTF2H3	1.59171e-05	-0.673058	0	0	20	6.9766e-06	0.0199234	eQTLGen_cis_eQTLs	NA	Yes	Fetal_Cortex:Left_Ventricle:Liver:Spleen:GM12878:IMR90:Mesenchymal_Stem_Cell:Mesendoderm:Trophoblast-like_Cell:hESC	9.546e-09	rs641760;rs28372579;rs4930719;rs28372579:rs641760:rs641760;rs12820906:rs641760;rs28372579:rs28372579:rs4930719;rs28372579:rs4930719	17
ENSG00000100226	GTPBP1	22	39101728	39134304	1	protein_coding	9567	GTPBP1	0.996189	-1.44819	0	0	0	NA	NA	NA	NA	Yes	Left_Ventricle:Liver:IMR90:Mesenchymal_Stem_Cell:Mesendoderm:Trophoblast-like_Cell:hESC	1.037e-12	rs6001872:rs112251865	23
ENSG00000189060	H1F0	22	38201114	38203442	1	protein_coding	3005	H1F0	0.154803	0.263936	0	0	1	3.947e-15	0	eQTLGen_trans_eQTLs	NA	No	NA	4.639e-12	rs72993806	15
ENSG00000196917	HCAR1	12	123104824	123215390	-1	protein_coding	27198	HCAR1	0.140999	-0.89126	0	0	0	NA	NA	NA	NA	Yes	Mesenchymal_Stem_Cell	4.216e-08	rs641760;rs28372579	17
ENSG00000255398	HCAR3	12	123199303	123201439	-1	protein_coding	8843	HCAR3	6.93118e-06	2.82613	0	0	0	NA	NA	NA	NA	Yes	Mesenchymal_Stem_Cell	4.216e-08	rs641760;rs28372579	17
ENSG00000179111	HES7	17	8023908	8027410	-1	protein_coding	84667	HES7	0.782884	0.446452	0	0	0	NA	NA	NA	NA	Yes	Adult_Cortex:Fetal_Cortex:GM12878:IMR90:Mesenchymal_Stem_Cell:Mesendoderm	1.438e-07	rs17879377:rs78414518	21
ENSG00000146066	HIGD2A	5	175815748	175816772	1	protein_coding	192286	HIGD2A	0.238671	0.380602	0	0	5	7.8911e-08	0.000999201	eQTLGen_trans_eQTLs	NA	No	NA	1.555e-08	rs641760;rs28372579;rs4930719	17
ENSG00000130787	HIP1R	12	123319000	123347507	1	protein_coding	9026	HIP1R	1.44297e-06	-0.568881	0	0	1	1.1314e-05	0.0318095	eQTLGen_cis_eQTLs	NA	Yes	Adult_Cortex:Fetal_Cortex:IMR90:Mesenchymal_Stem_Cell	9.546e-09	rs641760;rs641760:rs641760;rs28372579:rs641760;rs4930719;rs28372579;rs12820906	17
ENSG00000187837	HIST1H1C	6	26055968	26056699	-1	protein_coding	3006	HIST1H1C	NA	0.137228	0	0	1	2.2369e-43	0	eQTLGen_trans_eQTLs	NA	No	NA	4.639e-12	rs72993806	15
ENSG00000180573	HIST1H2AC	6	26124373	26139344	1	protein_coding	8334	HIST1H2AC	0.599176	0.739679	0	0	1	8.1463e-19	0	eQTLGen_trans_eQTLs	NA	No	NA	4.639e-12	rs72993806	15
ENSG00000180596	HIST1H2BC	6	26115101	26124154	-1	protein_coding	8347	HIST1H2BC	0.00287801	0.335736	0	0	1	8.5495e-11	0	eQTLGen_trans_eQTLs	NA	No	NA	4.639e-12	rs72993806	15
ENSG00000158373	HIST1H2BD	6	26158349	26171577	1	protein_coding	3017	HIST1H2BD	0.000277979	-0.0152977	0	0	2	3.7851e-62	0	eQTLGen_trans_eQTLs	NA	No	NA	1.828e-16	rs72993806;rs117706999	15
ENSG00000197697	HIST1H2BE	6	26183958	26184454	1	protein_coding	8344	HIST1H2BE	0.000307872	0.445738	0	0	1	6.1583e-09	0.000135433	eQTLGen_trans_eQTLs	NA	No	NA	4.639e-12	rs72993806	15
ENSG00000197903	HIST1H2BK	6	27106073	27114619	-1	protein_coding	85236	HIST1H2BK	0.490754	-0.0430523	0	0	1	1.0166e-21	0	eQTLGen_trans_eQTLs	NA	No	NA	4.639e-12	rs72993806	15
ENSG00000197409	HIST1H3D	6	26197068	26199521	-1	protein_coding	8351	HIST1H3D	0.0111951	NA	0	0	1	6.5651e-25	0	eQTLGen_trans_eQTLs	NA	No	NA	4.639e-12	rs72993806	15
ENSG00000198518	HIST1H4E	6	26204858	26206266	1	protein_coding	8367	HIST1H4E	0.000642251	1.83578	0	0	1	6.0881e-07	0.00532876	eQTLGen_trans_eQTLs	NA	No	NA	4.639e-12	rs72993806	15
ENSG00000158406	HIST1H4H	6	26281283	26285762	-1	protein_coding	8365	HIST1H4H	0.00879033	1.05907	0	0	1	8.5261e-30	0	eQTLGen_trans_eQTLs	NA	No	NA	4.639e-12	rs72993806	15
ENSG00000184678	HIST2H2BE	1	149856010	149858232	-1	protein_coding	8349	HIST2H2BE	0.487683	-0.733438	0	0	1	1.0102e-08	0.00016276	eQTLGen_trans_eQTLs	NA	No	NA	4.639e-12	rs72993806	15
ENSG00000203814	HIST2H2BF	1	149754245	149783928	-1	protein_coding	440689	HIST2H2BF	0.026	-0.101156	0	0	1	1.1621e-12	0	eQTLGen_trans_eQTLs	NA	No	NA	4.639e-12	rs72993806	15
ENSG00000113161	HMGCR	5	74632154	74657929	1	protein_coding	3156	HMGCR	0.999837	-0.514442	0	0	3	3.2351e-09	0.000107836	eQTLGen_trans_eQTLs	NA	No	NA	1.951e-10	rs1986649;rs7986407;rs9532580;rs9549260	19
ENSG00000125944	HNRNPR	1	23630264	23670829	-1	protein_coding	10236	HNRNPR	0.999079	-0.733548	0	0	0	NA	NA	NA	NA	Yes	IMR90	1.655e-20	rs2235529;rs10917130	1
ENSG00000174775	HRAS	11	532242	537287	-1	protein_coding	3265	HRAS	0.00794105	NA	0	0	0	NA	NA	NA	NA	Yes	Promoter_anchored_loops	1.089e-12	rs547025	11
ENSG00000142798	HSPG2	1	22148738	22263790	-1	protein_coding	3339	HSPG2	6.94654e-06	NA	0	0	38	3.6262e-11	0	eQTLGen_cis_eQTLs:BIOSQTL/BIOS_eQTL_geneLevel	NA	Yes	IMR90	7.388e-21	rs10917130;rs41307810;rs3765350;rs2235529;rs12404660;rs7519889	1
ENSG00000117318	ID3	1	23884409	23886285	-1	protein_coding	3399	ID3	0.688794	-0.270654	0	0	0	NA	NA	NA	NA	Yes	Mesenchymal_Stem_Cell	1.655e-20	rs2235529;rs10917130	1
ENSG00000119922	IFIT2	10	91061712	91069033	1	protein_coding	3433	IFIT2	0.0014822	-0.433526	0	0	3	2.0582e-07	0.00202116	eQTLGen_trans_eQTLs	NA	No	NA	4.821e-14	rs10069690;rs4449583;rs2736100	7
ENSG00000185885	IFITM1	11	313506	315272	1	protein_coding	8519	IFITM1	0.221686	-0.30084	0	0	31	3.8604e-12	0	eQTLGen_cis_eQTLs	NA	Yes	Promoter_anchored_loops	4.776e-13	rs547025;rs11246035;rs532483;rs12419714	11
ENSG00000185201	IFITM2	11	307631	315272	1	protein_coding	10581	IFITM2	0.299376	2.27367	0	0	33	2.801e-14	0	eQTLGen_cis_eQTLs:BIOSQTL/BIOS_eQTL_geneLevel	NA	Yes	Promoter_anchored_loops	4.776e-13	rs547025;rs11246035;rs532483;rs12419714	11
ENSG00000142089	IFITM3	11	319669	327537	-1	protein_coding	10410	IFITM3	0.199202	2.72623	0	0	23	1.2562e-11	0	eQTLGen_cis_eQTLs	NA	No	NA	4.776e-13	rs547025;rs532483;rs12419714	11
ENSG00000168685	IL7R	5	35852797	35879705	1	protein_coding	3575	IL7R	3.72072e-06	1.76705	0	0	5	1.4674e-07	0.00157412	eQTLGen_trans_eQTLs	NA	No	NA	7.126e-08	rs2293607	4
ENSG00000148950	IMMP1L	11	31453948	31531192	-1	protein_coding	196294	IMMP1L	0.0207132	0.0151483	0	0	0	NA	NA	NA	NA	Yes	Fetal_Cortex:IMR90:Mesenchymal_Stem_Cell:Mesendoderm	1.755e-20	rs7110547:rs11031783:rs11031704:rs7116279;rs11031704:rs11031731:rs61889171:rs12280757:rs11031724	13
ENSG00000138448	ITGAV	2	187454792	187545628	1	protein_coding	3685	ITGAV	0.477866	-1.40619	0	0	2	6.9049e-06	0.0429424	eQTLGen_trans_eQTLs	NA	No	NA	1.598e-12	rs4449583;rs2736100	7
ENSG00000148841	ITPRIP	10	106071894	106098162	-1	protein_coding	85450	ITPRIP	1.35269e-05	0.357391	0	0	24	1.3114e-09	1.30993e-05	eQTLGen_cis_eQTLs	NA	Yes	EP_correlation_organ_oneway:Left_Ventricle:IMR90:Mesenchymal_Stem_Cell:Mesendoderm:Trophoblast-like_Cell:hESC	1.204e-09	rs7902587;rs9419958;rs7907606;rs7902587:rs9419958	10
ENSG00000009765	IYD	6	150690028	150727105	1	protein_coding	389434	IYD	0.0883092	8.24672	0	0	0	NA	NA	NA	NA	Yes	Mesenchymal_Stem_Cell	2.766e-31	rs1408462:rs58415480:rs12110523:rs4870084	8
ENSG00000100221	JOSD1	22	39081548	39097561	-1	protein_coding	9929	JOSD1	0.319905	-1.10562	0	0	0	NA	NA	NA	NA	Yes	Left_Ventricle:Liver:IMR90:Mesenchymal_Stem_Cell:Mesendoderm:Trophoblast-like_Cell:hESC	1.037e-12	rs6001872:rs112251865	23
ENSG00000107104	KANK1	9	470291	746105	1	protein_coding	23189	KANK1	NA	1.27181	21	13.06	24	2.5262e-62	0	eQTLcatalogue/Fairfax_2014_IFN24:eQTLcatalogue/Lepik_2017_ge_blood:eQTLcatalogue/TwinsUK_ge_skin:PsychENCODE_eQTLs:eQTLGen_cis_eQTLs:BIOSQTL/BIOS_eQTL_geneLevel:CMC_SVA_cis:GTEx/v8/Colon_Transverse:GTEx/v8/Esophagus_Mucosa:GTEx/v8/Skin_Not_Sun_Exposed_Suprapubic:GTEx/v8/Skin_Sun_Exposed_Lower_leg:GTEx/v7/Esophagus_Mucosa:GTEx/v7/Skin_Sun_Exposed_Lower_leg:GTEx/v6/Skin_Sun_Exposed_Lower_leg	NA	Yes	Left_Ventricle:Right_Ventricle:IMR90:Mesenchymal_Stem_Cell:Mesendoderm:Trophoblast-like_Cell:hESC	5.634e-13	rs10739107;rs10975803;rs138821078;rs4740851;rs10815466;rs10976044;rs10976679;rs10739107:rs138821078:rs10975803:rs10976044:rs34800401:rs10115078:rs7036783:rs1812266	9
ENSG00000120696	KBTBD7	13	41763969	41768702	-1	protein_coding	84078	KBTBD7	0.223861	0.0649746	0	0	61	1.6431e-06	0.00486542	eQTLGen_cis_eQTLs	NA	Yes	Liver:GM12878:IMR90	1.066e-11	rs7986407;rs1986649;rs9532583;rs61963209	19
ENSG00000182255	KCNA4	11	30031288	30038570	-1	protein_coding	3739	KCNA4	0.946234	-1.24615	0	0	0	NA	NA	NA	NA	Yes	Mesenchymal_Stem_Cell:Mesendoderm:hESC	4.475e-08	rs11031006	12
ENSG00000170049	KCNAB3	17	7825177	7833121	-1	protein_coding	9196	KCNAB3	6.03306e-12	-0.0306089	0	0	0	NA	NA	NA	NA	Yes	Fetal_Cortex:Liver:GM12878:IMR90:Mesenchymal_Stem_Cell	1.438e-07	rs17879377:rs78414518	21
ENSG00000162975	KCNF1	2	11052063	11054350	1	protein_coding	3754	KCNF1	0.498369	NA	0	0	0	NA	NA	NA	NA	Yes	IMR90:Mesenchymal_Stem_Cell	7.127e-12	rs10929759:rs16857668:rs11679605:rs10929754:rs10929753:rs12994384:rs12994384;rs4669748:rs974163:rs4669748:rs6728828:rs10929757:rs4668732:rs1529868	3
ENSG00000213859	KCTD11	17	7255208	7258258	1	protein_coding	147040	KCTD11	0.447451	-0.650823	0	0	0	NA	NA	NA	NA	Yes	Adult_Cortex	3.419e-07	rs17879377	21
ENSG00000178202	KDELC2	11	108342832	108369159	-1	protein_coding	143888	KDELC2	1.57002e-08	-0.278548	17	28	87	1.3044e-43	0	PsychENCODE_eQTLs:eQTLGen_cis_eQTLs:BIOSQTL/BIOS_eQTL_geneLevel:GTEx/v8/Nerve_Tibial:GTEx/v8/Skin_Not_Sun_Exposed_Suprapubic	NA	Yes	Aorta:Liver:GM12878:IMR90:Mesenchymal_Stem_Cell:Mesendoderm:Trophoblast-like_Cell:hESC	3.013e-18	rs72993806;rs149934734;rs117706999;rs79088165;rs189426461;rs111559044;rs78142456;rs79088165:rs78142456:rs72993806	15
ENSG00000004487	KDM1A	1	23345941	23410182	1	protein_coding	23028	KDM1A	0.991028	0.241353	0	0	0	NA	NA	NA	NA	Yes	IMR90:Mesenchymal_Stem_Cell	1.655e-20	rs2235529;rs10917130	1
ENSG00000089094	KDM2B	12	121866900	122018920	-1	protein_coding	84678	KDM2B	0.999786	-0.426754	0	0	0	NA	NA	NA	NA	Yes	Adult_Cortex:Fetal_Cortex	1.962e-08	rs641760;rs28372579:rs641760	17
ENSG00000121621	KIF18A	11	28042167	28129855	-1	protein_coding	81930	KIF18A	0.149441	-0.472005	0	0	0	NA	NA	NA	NA	Yes	Left_Ventricle	4.475e-08	rs11031006	12
ENSG00000168280	KIF5C	2	149632819	149883273	1	protein_coding	3800	KIF5C	0.999516	NA	0	0	5	6.773e-11	0	eQTLGen_trans_eQTLs	NA	No	NA	7.126e-08	rs2293607	4
ENSG00000184445	KNTC1	12	123011793	123110943	1	protein_coding	9735	KNTC1	4.77718e-32	-0.251481	0	0	140	2.3695e-08	0.00011473	eQTLGen_cis_eQTLs	NA	Yes	Adult_Cortex:Fetal_Cortex:GM12878:IMR90:Mesenchymal_Stem_Cell:hESC	8.439e-09	rs641760;rs28372579;rs4930719;rs28372579:rs641760:rs641760;rs28372579:rs641760;rs12820906	17
ENSG00000115919	KYNU	2	143635067	143799890	1	protein_coding	8942	KYNU	1.82769e-09	0.756469	0	0	1	3.193e-06	0.0228129	eQTLGen_trans_eQTLs	NA	No	NA	3.416e-08	rs641760;rs4930719;rs28372579	17
ENSG00000100395	L3MBTL2	22	41601209	41627275	1	protein_coding	83746	L3MBTL2	0.013028	-0.618259	0	0	19	4.4342e-13	0	eQTLGen_cis_eQTLs	NA	No	NA	4.88e-12	rs6001872	23
ENSG00000204381	LAYN	11	111411005	111432264	1	protein_coding	143903	LAYN	2.17831e-06	-0.365129	0	0	0	NA	NA	NA	NA	Yes	Mesenchymal_Stem_Cell	1.049e-12	rs79088165:rs78142456	15
ENSG00000179241	LDLRAD3	11	35965531	36253686	1	protein_coding	143458	LDLRAD3	0.0250893	0.96846	0	0	0	NA	NA	NA	NA	Yes	Mesenchymal_Stem_Cell	1.198e-08	rs2553772	14
ENSG00000165046	LETM2	8	38243725	38267045	1	protein_coding	137994	LETM2	1.34236e-10	-0.443339	0	0	1	1.4868e-06	0.01163	eQTLGen_trans_eQTLs	NA	No	NA	7.578e-10	rs9549260	19
ENSG00000205213	LGR4	11	27387508	27494322	-1	protein_coding	55366	LGR4	0.994113	0.243578	0	0	0	NA	NA	NA	NA	Yes	Mesenchymal_Stem_Cell	4.475e-08	rs11031006	12
ENSG00000183722	LHFP	13	39917029	40177665	-1	protein_coding	10186	LHFP	0.463788	0.103632	0	0	0	NA	NA	NA	NA	Yes	Left_Ventricle	4.48e-07	rs61963209	19
ENSG00000148943	LIN7C	11	27516123	27528320	-1	protein_coding	55327	LIN7C	0.0300652	-0.643347	0	0	0	NA	NA	NA	NA	Yes	Mesenchymal_Stem_Cell:Mesendoderm	4.475e-08	rs11031006	12
ENSG00000160789	LMNA	1	156052364	156109880	1	protein_coding	4000	LMNA	0.993449	-0.15153	0	0	2	1.4547e-07	0.00155068	eQTLGen_trans_eQTLs	NA	No	NA	1.951e-10	rs1986649;rs7986407;rs9532580	19
ENSG00000072201	LNX1	4	54325468	54567572	-1	protein_coding	84708	LNX1	0.00724363	-0.240622	23	11.73	15	1.36251e-05	9.06829e-17	GTEx/v8/Artery_Aorta:GTEx/v7/Artery_Aorta	NA	No	NA	5.947e-14	rs62325482;rs55732414;rs4864806;rs62323678;rs66604018;rs67751869	5
ENSG00000153395	LPCAT1	5	1456595	1524092	-1	protein_coding	79888	LPCAT1	0.813682	-0.169465	0	0	2	4.5039e-07	6.42484e-05	PsychENCODE_eQTLs	NA	Yes	Promoter_anchored_loops	6.072e-15	rs2242652;rs72709458;rs56023411:rs7712562	7
ENSG00000171757	LRRC34	3	169511216	169530774	-1	protein_coding	151827	LRRC34	5.88856e-07	-0.228917	20	14.74	37	3.48556e-17	4.94146e-22	eQTLcatalogue/HipSci_ge_iPSC:PsychENCODE_eQTLs:GTEx/v8/Adipose_Subcutaneous:GTEx/v8/Adipose_Visceral_Omentum:GTEx/v8/Adrenal_Gland:GTEx/v8/Artery_Aorta:GTEx/v8/Artery_Tibial:GTEx/v8/Brain_Cerebellar_Hemisphere:GTEx/v8/Esophagus_Gastroesophageal_Junction:GTEx/v8/Esophagus_Muscularis:GTEx/v8/Heart_Left_Ventricle:GTEx/v8/Muscle_Skeletal:GTEx/v8/Nerve_Tibial:GTEx/v8/Cells_Cultured_fibroblasts:GTEx/v8…	NA	Yes	GM12878	4.061e-08	rs2293607	4
ENSG00000161328	LRRC56	11	537527	554916	1	protein_coding	115399	LRRC56	0.000110646	2.12856	0	0	17	3.88437e-06	0.00046341	PsychENCODE_eQTLs	NA	Yes	Promoter_anchored_loops	4.776e-13	rs547025;rs11246035;rs532483	11
ENSG00000188306	LRRIQ4	3	169539710	169555563	1	protein_coding	344657	LRRIQ4	0.00168555	0.0346851	0	0	36	8.28613e-28	7.30656e-25	PsychENCODE_eQTLs:BRAINEAC/FCTX:BRAINEAC/HIPP:BRAINEAC/PUTM:BRAINEAC/SNIG:BRAINEAC/TCTX:BRAINEAC/aveALL:GTEx/v8/Testis:GTEx/v6/Testis	NA	Yes	GM12878	4.061e-08	rs2293607	4
ENSG00000183011	LSMD1	17	7760003	7788556	-1	protein_coding	84316	LSMD1	0.00287648	-0.647347	0	0	0	NA	NA	NA	NA	Yes	Adult_Cortex:Fetal_Cortex:IMR90	3.419e-07	rs17879377	21
ENSG00000169641	LUZP1	1	23410516	23504301	-1	protein_coding	7798	LUZP1	0.287846	-0.967992	0	0	0	NA	NA	NA	NA	Yes	Mesenchymal_Stem_Cell:Mesendoderm:Trophoblast-like_Cell	1.655e-20	rs2235529;rs10917130	1
ENSG00000128285	MCHR1	22	41074754	41078818	1	protein_coding	2847	MCHR1	0.00114839	-0.0810065	0	0	28	1.0055e-08	5.78666e-05	PsychENCODE_eQTLs:eQTLGen_cis_eQTLs	NA	Yes	Aorta:Left_Ventricle:Liver:GM12878:IMR90:Mesenchymal_Stem_Cell:Mesendoderm:Trophoblast-like_Cell:hESC	1.037e-12	rs6001872;rs6001872:rs112251865	23
ENSG00000125885	MCM8	20	5931298	5975852	1	protein_coding	84515	MCM8	1.92893e-10	1.17014	1	22.4	1	2.9568e-06	0.00859545	eQTLGen_cis_eQTLs	NA	No	NA	2.826e-08	rs16991615	22
ENSG00000108590	MED31	17	6546635	6554954	-1	protein_coding	51003	MED31	0.000283388	0.127417	0	0	1	5.78073e-05	1.90075e-13	GTEx/v8/Skin_Not_Sun_Exposed_Suprapubic	NA	No	NA	4.932e-08	rs78414518	21
ENSG00000010165	METTL13	1	171750788	171783163	1	protein_coding	51603	METTL13	0.00133198	0.512936	0	0	3	5.5141e-18	0	eQTLGen_cis_eQTLs	NA	No	NA	2.763e-08	rs59760198	2
ENSG00000169519	METTL15	11	28129795	28355054	1	protein_coding	196074	METTL15	0.000155431	-1.29305	0	0	0	NA	NA	NA	NA	Yes	Left_Ventricle	4.475e-08	rs11031006	12
ENSG00000128268	MGAT3	22	39853349	39888199	1	protein_coding	4248	MGAT3	0.46018	-0.365142	0	0	0	NA	NA	NA	NA	Yes	Left_Ventricle:Liver:GM12878:IMR90:Mesenchymal_Stem_Cell:Mesendoderm:Trophoblast-like_Cell:hESC	1.037e-12	rs6001872:rs112251865	23
ENSG00000196588	MKL1	22	40806285	41032706	-1	protein_coding	57591	MKL1	0.540324	-0.588524	0	0	5	9.41602e-05	3.53233e-05	GTEx/v8/Whole_Blood:GTEx/v8/Muscle_Skeletal:GTEx/v7/Muscle_Skeletal	NA	Yes	Left_Ventricle:Liver:IMR90:Mesenchymal_Stem_Cell:Mesendoderm:Trophoblast-like_Cell:hESC	1.037e-12	rs6001872;rs112251865;rs6001872:rs112251865	23
ENSG00000175727	MLXIP	12	122516628	122631894	1	protein_coding	22877	MLXIP	0.975748	NA	0	0	0	NA	NA	NA	NA	Yes	Adult_Cortex:Fetal_Cortex	1.17e-08	rs641760	17
ENSG00000129255	MPDU1	17	7486847	7496107	1	protein_coding	9526	MPDU1	0.144211	-0.62783	2	8.828	0	NA	NA	NA	NA	Yes	Hippocampus:GM12878:IMR90:Mesenchymal_Stem_Cell:Mesendoderm:hESC	4.932e-08	rs78414518;rs17879377	21
ENSG00000051825	MPHOSPH9	12	123636867	123728561	-1	protein_coding	10198	MPHOSPH9	0.000759987	-0.131484	130	15.11	233	1.0433e-73	0	eQTLcatalogue/GEUVADIS_ge_LCL:eQTLcatalogue/HipSci_ge_iPSC:eQTLcatalogue/Lepik_2017_ge_blood:eQTLcatalogue/Quach_2016_ge_monocyte_LPS:eQTLcatalogue/Quach_2016_ge_monocyte_naive:eQTLcatalogue/Quach_2016_ge_monocyte_Pam3CSK4:eQTLcatalogue/Quach_2016_ge_monocyte_R848:DICE/B_cell_naive:DICE/Monocyte_classical:DICE/Monocyte_non_classical:DICE/T_CD4_TFH:DICE/T_CD4_TH1:DICE/T_CD4_TH17:DICE/T_CD4_TH1_17:…	NA	No	NA	7.637e-09	rs641760;rs28372579;rs1716162;rs4930719;rs12820906	17
ENSG00000005381	MPO	17	56347217	56358296	-1	protein_coding	4353	MPO	1.74837e-09	-0.347452	0	0	3	1.2527e-08	0.000175579	eQTLGen_trans_eQTLs	NA	No	NA	1.951e-10	rs1986649;rs7986407;rs9532580;rs9549260	19
ENSG00000150054	MPP7	10	28339922	28623415	-1	protein_coding	143098	MPP7	8.57972e-07	2.00841	0	0	1	1.076e-06	0.00866858	eQTLGen_trans_eQTLs	NA	No	NA	1.951e-10	rs1986649	19
ENSG00000066382	MPPED2	11	30406040	30608419	-1	protein_coding	744	MPPED2	0.970565	0.0216018	0	0	0	NA	NA	NA	NA	Yes	Aorta:Left_Ventricle:Right_Ventricle:Mesenchymal_Stem_Cell:Mesendoderm:Trophoblast-like_Cell:hESC	4.475e-08	rs11031006	12
ENSG00000197965	MPZL1	1	167690429	167761156	1	protein_coding	9019	MPZL1	0.327817	1.92787	0	0	1	3.6145e-06	0.0253765	eQTLGen_trans_eQTLs	NA	No	NA	6.794e-10	rs7986407;rs9532580	19
ENSG00000102738	MRPS31	13	41303432	41345309	-1	protein_coding	10240	MRPS31	4.0936e-05	-0.0208922	45	28	215	9.8622e-51	0	eQTLcatalogue/Lepik_2017_ge_blood:PsychENCODE_eQTLs:eQTLGen_cis_eQTLs:GTEx/v8/Skin_Sun_Exposed_Lower_leg:GTEx/v8/Testis:GTEx/v8/Thyroid	NA	Yes	Adult_Cortex:Fetal_Cortex:Liver:GM12878:IMR90:Mesenchymal_Stem_Cell:Mesendoderm:Trophoblast-like_Cell:hESC	1.066e-11	rs9532583;rs9532585;rs2297014;rs7986407;rs9549296;rs1986649;rs9532580;rs9549260;rs61963209;rs9566605;rs2297014:rs7986407:rs1986649:rs7986407;rs9532583:rs9549260:rs9532583:rs61963209:rs117245733:rs7986407	18:19:00
ENSG00000149516	MS4A3	11	59824060	59838601	1	protein_coding	932	MS4A3	4.21113e-05	-0.575706	0	0	3	1.3808e-10	0	eQTLGen_trans_eQTLs	NA	No	NA	1.951e-10	rs1986649;rs7986407;rs9532580;rs9549260	19
ENSG00000120662	MTRF1	13	41790505	41837742	-1	protein_coding	9617	MTRF1	1.54398e-07	-0.263738	0	0	3	1.4883e-06	0.00446706	eQTLGen_cis_eQTLs	NA	Yes	GM12878:IMR90:Mesenchymal_Stem_Cell	2.04e-09	rs2297014;rs61963209;rs9566605	19
ENSG00000120279	MYCT1	6	153019030	153045702	1	protein_coding	80177	MYCT1	6.34323e-05	0.877283	0	0	0	NA	NA	NA	NA	Yes	IMR90:Mesendoderm:hESC	3.648e-32	rs1408462:rs58415480:rs12110523:rs4870084:rs6901631:rs75730028:rs633891:rs6904757:rs13206045;rs13196107;rs35569312:rs35569312	8
ENSG00000085274	MYNN	3	169490619	169507504	1	protein_coding	55892	MYNN	0.650144	-1.6491	28	21.9	36	2.06227e-11	1.14466e-07	eQTLcatalogue/BLUEPRINT_ge_neutrophil:PsychENCODE_eQTLs:GTEx/v8/Artery_Aorta:GTEx/v8/Artery_Tibial:GTEx/v8/Testis:GTEx/v7/Testis:GTEx/v6/Testis	NA	No	NA	4.061e-08	rs2293607	4
ENSG00000142794	NBPF3	1	21766621	21811498	1	protein_coding	84224	NBPF3	1.9838e-11	-0.322123	0	0	16	5.0186e-07	1.18279e-94	eQTLGen_cis_eQTLs:CMC_NoSVA_cis:GTEx/v7/Pancreas:GTEx/v7/Testis:GTEx/v7/Thyroid	NA	Yes	Promoter_anchored_loops	7.388e-21	rs10917130;rs2235529;rs12404660;rs72478520;rs7519889	1
ENSG00000165795	NDRG2	14	21484922	21539031	-1	protein_coding	57447	NDRG2	0.126597	-0.622537	0	0	1	1.3888e-06	0.0109165	eQTLGen_trans_eQTLs	NA	No	NA	6.794e-10	rs7986407;rs9532580	19
ENSG00000067141	NEO1	15	73344051	73597547	1	protein_coding	4756	NEO1	0.999855	-1.149	0	0	2	3.2054e-06	0.0228828	eQTLGen_trans_eQTLs	NA	No	NA	7.126e-08	rs2293607	4
ENSG00000215041	NEURL4	17	7218947	7232712	-1	protein_coding	84461	NEURL4	0.999977	-0.520877	0	0	0	NA	NA	NA	NA	Yes	GM12878:IMR90	2.446e-14	rs78414518:rs143094271	21
ENSG00000188811	NHLRC3	13	39612443	39624246	1	protein_coding	387921	NHLRC3	0.00380866	-1.00095	0	0	0	NA	NA	NA	NA	Yes	IMR90:Trophoblast-like_Cell:hESC	5.468e-11	rs7986407;rs9532583:rs1986649:rs9549260:rs9532583:rs2297014:rs9532583;rs9532585:rs61963209	19
ENSG00000140807	NKD1	16	50582241	50670647	1	protein_coding	85407	NKD1	0.99793	-1.22578	0	0	0	NA	NA	NA	NA	Yes	IMR90	2.816e-07	rs66998222	20
ENSG00000169992	NLGN2	17	7308193	7323179	1	protein_coding	57555	NLGN2	0.992625	-0.095466	0	0	12	5.4505e-09	3.87797e-05	eQTLGen_cis_eQTLs:BIOSQTL/BIOS_eQTL_geneLevel	NA	Yes	Liver:IMR90:Mesenchymal_Stem_Cell	3.841e-26	rs143094271;rs41283405;rs78378222;rs17879377;rs35850753;rs78414518;rs143094271:rs17879377	21
ENSG00000174885	NLRP6	11	278365	285359	1	protein_coding	171389	NLRP6	NA	-0.192769	5	11.63	0	NA	NA	NA	NA	No	NA	3.571e-11	rs547025;rs12419714	11
ENSG00000149308	NPAT	11	108027942	108093369	-1	protein_coding	4863	NPAT	0.142677	-0.741015	7	10.43	74	6.3172e-23	0	eQTLGen_cis_eQTLs:BIOSQTL/BIOS_eQTL_geneLevel:GTEx/v8/Artery_Aorta:GTEx/v8/Nerve_Tibial:GTEx/v7/Artery_Aorta:GTEx/v7/Artery_Tibial:GTEx/v7/Nerve_Tibial	NA	Yes	Adult_Cortex:Fetal_Cortex:Aorta:Left_Ventricle:Liver:GM12878:IMR90:Mesenchymal_Stem_Cell:Mesendoderm:Trophoblast-like_Cell:hESC	3.013e-18	rs72993806;rs189426461;rs182609357;rs78142456;rs149934734;rs117706999:rs78142456:rs72993806:rs79088165	15
ENSG00000221890	NPTXR	22	39214457	39239987	-1	protein_coding	23467	NPTXR	NA	-1.0617	0	0	0	NA	NA	NA	NA	Yes	Left_Ventricle:IMR90:Mesenchymal_Stem_Cell	3.144e-12	rs112251865:rs6001872	23
ENSG00000074527	NTN4	12	96051583	96184930	-1	protein_coding	59277	NTN4	0.994427	NA	0	0	5	2.2935e-11	0	eQTLGen_trans_eQTLs	NA	No	NA	7.126e-08	rs2293607	4
ENSG00000169006	NTSR2	2	11798304	11810290	-1	protein_coding	23620	NTSR2	2.52586e-05	-0.141435	0	0	0	NA	NA	NA	NA	Yes	IMR90:Mesenchymal_Stem_Cell	4.557e-10	rs10929754:rs10929753:rs10929759:rs16857668:rs11679605	3
ENSG00000107960	OBFC1	10	105642300	105677963	-1	protein_coding	79991	OBFC1	1.3253e-05	NA	26	17	28	2.90111e-17	0	eQTLcatalogue/BrainSeq_ge_brain:eQTLcatalogue/HipSci_ge_iPSC:PsychENCODE_eQTLs:eQTLGen_cis_eQTLs:BIOSQTL/BIOS_eQTL_geneLevel:GTEx/v8/Adipose_Subcutaneous:GTEx/v8/Artery_Aorta:GTEx/v8/Brain_Putamen_basal_ganglia:GTEx/v8/Colon_Sigmoid:GTEx/v8/Colon_Transverse:GTEx/v8/Esophagus_Mucosa:GTEx/v8/Esophagus_Muscularis:GTEx/v8/Heart_Atrial_Appendage:GTEx/v8/Heart_Left_Ventricle:GTEx/v8/Lung:GTEx/v8/Muscle…	NA	Yes	Adult_Cortex:Fetal_Cortex:IMR90:Mesenchymal_Stem_Cell:Mesendoderm:Trophoblast-like_Cell:hESC	1.204e-09	rs7902587;rs9419958;rs7907606	10
ENSG00000177947	ODF3	11	196738	200261	1	protein_coding	113746	ODF3	0.586975	1.89376	4	16.83	33	4.9816e-14	0	eQTLGen_cis_eQTLs:BIOSQTL/BIOS_eQTL_geneLevel	NA	No	NA	4.776e-13	rs547025;rs11246035;rs532483;rs12419714	11
ENSG00000111325	OGFOD2	12	123459127	123464590	1	protein_coding	79676	OGFOD2	3.80506e-07	-0.495076	5	16.51	233	1.40807e-18	0	eQTLcatalogue/GENCORD_ge_fibroblast:eQTLcatalogue/HipSci_ge_iPSC:PsychENCODE_eQTLs:eQTLGen_cis_eQTLs:BIOSQTL/BIOS_eQTL_geneLevel:xQTLServer_eQTLs:CMC_SVA_cis:CMC_NoSVA_cis:GTEx/v8/Adipose_Visceral_Omentum:GTEx/v8/Cells_EBV-transformed_lymphocytes:GTEx/v8/Artery_Aorta:GTEx/v8/Brain_Cerebellum:GTEx/v8/Colon_Transverse:GTEx/v8/Esophagus_Mucosa:GTEx/v8/Esophagus_Muscularis:GTEx/v8/Heart_Left_Ventricl…	NA	Yes	EP_links_oneway:Promoter_anchored_loops:Adult_Cortex:Fetal_Cortex:Spleen:GM12878:IMR90:Mesenchymal_Stem_Cell:Mesendoderm:Trophoblast-like_Cell:hESC	7.637e-09	rs641760;rs28372579;rs12820906;rs1716162;rs4930719;rs28372579:rs641760:rs641760;rs12820906:rs641760	17
ENSG00000182500	ORAI1	12	122064455	122080583	1	protein_coding	84876	ORAI1	0.00305336	1.18534	0	0	0	NA	NA	NA	NA	Yes	Fetal_Cortex	4.216e-08	rs641760;rs28372579	17
ENSG00000137843	PAK6	15	40509629	40569688	1	protein_coding	56924	PAK6	0.00128179	0.365067	0	0	2	2.6272e-06	0.0193422	eQTLGen_trans_eQTLs	NA	No	NA	7.126e-08	rs2293607	4
ENSG00000007372	PAX6	11	31806340	31839509	-1	protein_coding	5080	PAX6	0.998808	-1.95552	0	0	7	0.000207557	0.0158114	PsychENCODE_eQTLs	NA	Yes	Fetal_Cortex:IMR90:Mesenchymal_Stem_Cell:Mesendoderm:hESC	1.755e-20	rs3858445;rs6484574;rs7110547:rs11031783:rs11031006:rs11031704:rs7116279;rs11031704:rs11031731:rs61889171:rs12280757:rs11031724:rs3858445:rs12270749	12:13:00
ENSG00000179715	PCED1B	12	47473386	47630443	1	protein_coding	91523	PCED1B	0.00826613	-0.701179	0	0	0	NA	NA	NA	NA	Yes	IMR90:Mesenchymal_Stem_Cell:Mesendoderm:hESC	3.465e-08	rs7976280	16
ENSG00000148843	PDCD11	10	105156405	105206049	1	protein_coding	22984	PDCD11	0.468449	-0.805378	0	0	0	NA	NA	NA	NA	Yes	Fetal_Cortex	8.619e-08	rs7902587	10
ENSG00000100311	PDGFB	22	39619364	39640756	-1	protein_coding	5155	PDGFB	0.966288	NA	0	0	7	1.02697e-05	0.049	DICE/T_CD8_naive	NA	No	NA	4.908e-12	rs112251865	23
ENSG00000134853	PDGFRA	4	55095264	55164414	1	protein_coding	5156	PDGFRA	0.999877	-1.3124	0	0	12	4.50303e-05	0.00418082	PsychENCODE_eQTLs	NA	Yes	IMR90:Mesenchymal_Stem_Cell:Mesendoderm:hESC	5.947e-14	rs55732414;rs4864806;rs62323678;rs55732414:rs4864806;rs62323678:rs62323678:rs4864806:rs66604018:rs67751869	5
ENSG00000110435	PDHX	11	34937376	35042138	1	protein_coding	8050	PDHX	0.00137029	0.965011	0	0	33	NA	0.009	CMC_SVA_cis	NA	Yes	GM12878:IMR90:Mesenchymal_Stem_Cell	1.198e-08	rs2553772	14
ENSG00000143870	PDIA6	2	10923517	10978103	-1	protein_coding	10130	PDIA6	0.120591	NA	0	0	0	NA	NA	NA	NA	Yes	Left_Ventricle:IMR90:Mesenchymal_Stem_Cell:Mesendoderm	7.127e-12	rs10929754:rs10929753:rs12994384:rs12994384;rs4669748:rs974163:rs4669748:rs6728828:rs10929757:rs4668732:rs1529868:rs10929759:rs16857668:rs11679605	3
ENSG00000179094	PER1	17	8043790	8059824	-1	protein_coding	5187	PER1	0.875749	-0.517542	0	0	0	NA	NA	NA	NA	Yes	Adult_Cortex	3.419e-07	rs17879377	21
ENSG00000178921	PFAS	17	8150936	8173809	1	protein_coding	5198	PFAS	2.79097e-08	-0.866843	0	0	0	NA	NA	NA	NA	Yes	Fetal_Cortex	3.419e-07	rs17879377	21
ENSG00000081913	PHLPP1	18	60382672	60647666	1	protein_coding	23239	PHLPP1	0.918154	0.122534	0	0	3	7.8972e-12	0	eQTLGen_trans_eQTLs	NA	No	NA	1.951e-10	rs1986649;rs7986407;rs9532580;rs9549260	19
ENSG00000070047	PHRF1	11	576486	612222	1	protein_coding	57661	PHRF1	0.948919	NA	0	0	0	NA	NA	NA	NA	Yes	Promoter_anchored_loops	1.091e-12	rs547025	11
ENSG00000153823	PID1	2	229715242	230136001	-1	protein_coding	55022	PID1	0.403719	0.742127	0	0	1	6.3782e-07	0.00559571	eQTLGen_trans_eQTLs	NA	No	NA	1.951e-10	rs1986649	19
ENSG00000090975	PITPNM2	12	123468027	123634562	-1	protein_coding	57605	PITPNM2	0.999994	-0.297419	56	16.51	221	8.52585e-34	0	eQTLGen_cis_eQTLs:BIOSQTL/BIOS_eQTL_geneLevel:GTEx/v8/Brain_Cerebellar_Hemisphere:GTEx/v8/Brain_Cerebellum:GTEx/v8/Esophagus_Mucosa:GTEx/v8/Testis:GTEx/v8/Thyroid:GTEx/v7/Brain_Cerebellar_Hemisphere:GTEx/v7/Brain_Cerebellum:GTEx/v7/Esophagus_Mucosa:GTEx/v7/Thyroid:GTEx/v6/Thyroid	NA	Yes	Promoter_anchored_loops:EP_correlation_organ_oneway:Adult_Cortex:Fetal_Cortex:Adrenal:Aorta:Bladder:Dorsolateral_Prefrontal_Cortex:Left_Ventricle:Liver:Lung:Pancreas:Right_Ventricle:Spleen:GM12878:IMR90:Mesenchymal_Stem_Cell:Mesendoderm:Neural_Progenitor_Cell:Trophoblast-like_Cell:hESC	7.637e-09	rs641760;rs28372579;rs12820906;rs1716162;rs4930719;rs12820906:rs641760:rs641760;rs28372579:rs641760	17
ENSG00000184363	PKP3	11	392614	404908	1	protein_coding	11187	PKP3	0.19435	-0.235047	0	0	0	NA	NA	NA	NA	Yes	Promoter_anchored_loops:IMR90:Mesenchymal_Stem_Cell	1.089e-12	rs547025	11
ENSG00000181222	POLR2A	17	7387685	7417933	1	protein_coding	5430	POLR2A	1	0.931618	1	5.042	2	NA	0.009	CMC_SVA_cis	NA	Yes	Spleen:GM12878:IMR90:Mesenchymal_Stem_Cell:Mesendoderm:Trophoblast-like_Cell	2.446e-14	rs143094271;rs78414518;rs143094271:rs78414518:rs17879377	21
ENSG00000162976	PQLC3	2	11295324	11319000	1	protein_coding	130814	PQLC3	6.74909e-07	0.0529121	0	0	12	5.65337e-05	0.00510877	PsychENCODE_eQTLs	NA	No	NA	6.018e-10	rs10929759	3
ENSG00000101000	PROCR	20	33759876	33765165	1	protein_coding	10544	PROCR	0.0101309	-0.393626	0	0	2	2.2674e-06	0.017127	eQTLGen_trans_eQTLs	NA	No	NA	1.951e-10	rs1986649;rs7986407;rs9532580	19
ENSG00000120685	PROSER1	13	39584003	39612252	-1	protein_coding	80209	PROSER1	0.736136	-0.470048	0	0	0	NA	NA	NA	NA	Yes	IMR90:Trophoblast-like_Cell:hESC	5.468e-11	rs7986407;rs9532583:rs1986649:rs9549260:rs9532583:rs2297014:rs9532583;rs9532585:rs61963209	19
ENSG00000135362	PRR5L	11	36317838	36486754	1	protein_coding	79899	PRR5L	0.0787689	1.0169	0	0	0	NA	NA	NA	NA	Yes	Left_Ventricle:IMR90:Mesenchymal_Stem_Cell	1.198e-08	rs2553772	14
ENSG00000135378	PRRG4	11	32851489	32879669	1	protein_coding	79056	PRRG4	0.181402	-0.656974	0	0	33	1.4457e-12	0	eQTLGen_cis_eQTLs	NA	Yes	Left_Ventricle	7.042e-15	rs2207548;rs932503;rs10835904;rs7110547;rs11031006	12:13:00
ENSG00000185627	PSMD13	11	236546	252983	1	protein_coding	5719	PSMD13	0.993513	1.38778	18	29	35	1.6428e-66	0	eQTLcatalogue/Fairfax_2014_IFN24:eQTLcatalogue/Fairfax_2014_LPS24:eQTLcatalogue/Fairfax_2014_LPS2:PsychENCODE_eQTLs:eQTLGen_cis_eQTLs:BIOSQTL/BIOS_eQTL_geneLevel:xQTLServer_eQTLs:CMC_SVA_cis:CMC_NoSVA_cis:GTEx/v8/Adipose_Visceral_Omentum:GTEx/v8/Brain_Nucleus_accumbens_basal_ganglia:GTEx/v8/Esophagus_Mucosa:GTEx/v8/Heart_Atrial_Appendage:GTEx/v8/Nerve_Tibial:GTEx/v8/Pancreas:GTEx/v8/Cells_Culture…	NA	Yes	Promoter_anchored_loops:GM12878:IMR90:Mesenchymal_Stem_Cell:Trophoblast-like_Cell:hESC	4.776e-13	rs547025;rs11246035;rs532483;rs12419714;rs547025:rs532483	11
ENSG00000174915	PTDSS2	11	448268	491393	1	protein_coding	81490	PTDSS2	0.000109483	-0.195309	0	0	12	1.0588e-05	1.65871e-07	eQTLGen_cis_eQTLs:GTEx/v8/Muscle_Skeletal	NA	Yes	Promoter_anchored_loops	4.776e-13	rs547025;rs532483;rs547025:rs532483	11
ENSG00000073756	PTGS2	1	186640923	186649559	-1	protein_coding	5743	PTGS2	0.999033	0.48129	0	0	1	1.9904e-06	0.0153458	eQTLGen_trans_eQTLs	NA	No	NA	1.951e-10	rs1986649	19
ENSG00000172053	QARS	3	49133365	49142553	-1	protein_coding	5859	QARS	8.7897e-08	-0.634756	0	0	2	5.8836e-07	0.00515389	eQTLGen_trans_eQTLs	NA	No	NA	4.12e-11	rs4449583;rs7705526	7
ENSG00000060749	QSER1	11	32914724	33014862	1	protein_coding	79832	QSER1	0.999936	-1.00992	0	0	15	1.2975e-07	0.000426279	eQTLGen_cis_eQTLs:GTEx/v8/Muscle_Skeletal	NA	Yes	Adult_Cortex:Fetal_Cortex:Mesenchymal_Stem_Cell:Mesendoderm	2.058e-21	rs7122664;rs28460016;rs11031731;rs7116279:rs7110547:rs11031783:rs11031704:rs7116279;rs11031704:rs11031731:rs61889171:rs12280757:rs11031724	13
ENSG00000076864	RAP1GAP	1	21922708	21995801	-1	protein_coding	5909	RAP1GAP	0.974157	-0.596614	0	0	20	5.8955e-10	0	eQTLGen_cis_eQTLs	NA	Yes	Adult_Cortex:Fetal_Cortex:GM12878:IMR90:Mesenchymal_Stem_Cell:Mesendoderm:Trophoblast-like_Cell	7.388e-21	rs10917130;rs41307810;rs2235529;rs12404660;rs41307810:rs3765350:rs2235529	1
ENSG00000128045	RASL11B	4	53728457	53733000	1	protein_coding	65997	RASL11B	0.290785	0.290613	0	0	0	NA	NA	NA	NA	Yes	Trophoblast-like_Cell	1.908e-10	rs55732414	5
ENSG00000099849	RASSF7	11	560404	564021	1	protein_coding	8045	RASSF7	3.45003e-06	NA	0	0	19	NA	0.009	CMC_SVA_cis	NA	Yes	Promoter_anchored_loops	4.776e-13	rs547025;rs532483	11
ENSG00000103479	RBL2	16	53467889	53525561	1	protein_coding	5934	RBL2	0.957797	-0.466961	0	0	0	NA	NA	NA	NA	Yes	IMR90:Mesenchymal_Stem_Cell	2.816e-07	rs66998222	20
ENSG00000100387	RBX1	22	41347351	41369313	1	protein_coding	9978	RBX1	0.940247	-0.356288	0	0	0	NA	NA	NA	NA	Yes	Left_Ventricle:Liver:Mesenchymal_Stem_Cell:Mesendoderm	3.144e-12	rs6001872:rs112251865	23
ENSG00000049449	RCN1	11	31833939	32127301	1	protein_coding	5954	RCN1	0.0163386	-0.0886329	0	0	1	0.000198623	1.01251e-23	GTEx/v8/Thyroid	NA	Yes	IMR90:Mesenchymal_Stem_Cell:hESC	1.755e-20	rs932503;rs11031006:rs11031704:rs7116279;rs11031704:rs11031731:rs61889171:rs12280757:rs11031724:rs3858445:rs7110547:rs11031783:rs12270749	12:13:00
ENSG00000137710	RDX	11	110045605	110167447	-1	protein_coding	5962	RDX	0.998955	NA	0	0	0	NA	NA	NA	NA	Yes	Left_Ventricle:IMR90	1.049e-12	rs79088165:rs78142456	15
ENSG00000091844	RGS17	6	153325594	153452384	-1	protein_coding	26575	RGS17	0.380684	-0.241391	0	0	9	5.79435e-05	0.049	DICE/T_CD8_naive_activated	NA	No	NA	2.894e-25	rs12110523	8
ENSG00000177963	RIC8A	11	207511	215113	1	protein_coding	60626	RIC8A	0.000378553	-0.341212	9	16.83	33	8.3917e-22	0	PsychENCODE_eQTLs:eQTLGen_cis_eQTLs:BIOSQTL/BIOS_eQTL_geneLevel:CMC_SVA_cis:GTEx/v8/Adipose_Subcutaneous:GTEx/v8/Brain_Nucleus_accumbens_basal_ganglia:GTEx/v8/Breast_Mammary_Tissue:GTEx/v8/Colon_Sigmoid:GTEx/v8/Heart_Atrial_Appendage:GTEx/v7/Heart_Atrial_Appendage	NA	Yes	GM12878:IMR90:Mesenchymal_Stem_Cell:Trophoblast-like_Cell:hESC	4.776e-13	rs547025;rs12419714;rs11246035;rs532483;rs547025:rs532483	11
ENSG00000188026	RILPL1	12	123955925	124018265	-1	protein_coding	353116	RILPL1	0.0660196	-0.388983	0	0	1	0.000735996	0.0452516	PsychENCODE_eQTLs	NA	Yes	Promoter_anchored_loops	2.061e-08	rs4930719;rs28372579;rs641760;rs28372579:rs641760	17
ENSG00000150977	RILPL2	12	123899936	123921264	-1	protein_coding	196383	RILPL2	0.0608722	-0.185559	17	7.294	215	1.57713e-19	0	eQTLcatalogue/CEDAR_B-cell_CD19:eQTLcatalogue/CEDAR_neutrophil_CD15:eQTLcatalogue/CEDAR_T-cell_CD4:eQTLcatalogue/CEDAR_T-cell_CD8:eQTLcatalogue/Fairfax_2012_B-cell_CD19:eQTLcatalogue/Fairfax_2014_LPS24:eQTLcatalogue/Fairfax_2014_naive:eQTLcatalogue/GENCORD_ge_LCL:eQTLcatalogue/GEUVADIS_ge_LCL:eQTLcatalogue/HipSci_ge_iPSC:eQTLGen_cis_eQTLs:GTEx/v8/Pancreas:GTEx/v8/Cells_Cultured_fibroblasts:GTEx/v…	NA	Yes	GM12878:IMR90:Mesenchymal_Stem_Cell	7.637e-09	rs4930719;rs28372579;rs12820906;rs641760;rs28372579:rs28372579:rs4930719;rs28372579:rs4930719	17
ENSG00000155906	RMND1	6	151725989	151773259	-1	protein_coding	55005	RMND1	7.66495e-07	0.739249	0	0	0	NA	NA	NA	NA	Yes	Left_Ventricle:Liver:IMR90:Mesenchymal_Stem_Cell:Mesendoderm:Trophoblast-like_Cell:hESC	3.648e-32	rs1408462:rs58415480:rs12110523:rs4870084:rs6901631:rs75730028:rs633891:rs6904757:rs13206045;rs13196107;rs35569312:rs35569312	8
ENSG00000023191	RNH1	11	494512	507300	-1	protein_coding	6050	RNH1	0.000213432	-0.00953195	0	0	2	0.000107808	2.17861e-14	GTEx/v8/Adipose_Subcutaneous	NA	Yes	Promoter_anchored_loops:Adult_Cortex:Spleen	1.089e-12	rs532483;rs12419714;rs547025	11
ENSG00000143365	RORC	1	151778547	151804348	-1	protein_coding	6097	RORC	0.997845	-0.558271	0	0	5	1.5458e-08	0.000188176	eQTLGen_trans_eQTLs	NA	No	NA	7.126e-08	rs2293607	4
ENSG00000262730	RP11-1099M24.7	17	7829249	7833940	-1	protein_coding	NA	NA	NA	NA	0	0	5	6.58633e-05	0.00584323	PsychENCODE_eQTLs	NA	Yes	Fetal_Cortex:Liver:GM12878:IMR90:Mesenchymal_Stem_Cell	1.281e-08	rs17879377;rs17879377:rs78414518	21
ENSG00000256861	RP11-512M8.5	12	122692326	122750970	-1	protein_coding	NA	NA	NA	NA	0	0	0	NA	NA	NA	NA	Yes	Fetal_Cortex	1.17e-08	rs641760	17
ENSG00000005175	RPAP3	12	48057070	48099844	-1	protein_coding	79657	RPAP3	0.14031	-0.0278806	0	0	0	NA	NA	NA	NA	Yes	GM12878:IMR90:Mesenchymal_Stem_Cell:Mesendoderm:Trophoblast-like_Cell:hESC	3.465e-08	rs7976280	16
ENSG00000187051	RPS19BP1	22	39925098	39928860	-1	protein_coding	91582	RPS19BP1	0.00589798	-0.442571	0	0	0	NA	NA	NA	NA	Yes	Aorta:Left_Ventricle:Liver:Right_Ventricle:Spleen:GM12878:IMR90:Mesenchymal_Stem_Cell:Mesendoderm:Neural_Progenitor_Cell:Trophoblast-like_Cell:hESC	1.037e-12	rs6001872:rs112251865	23
ENSG00000111011	RSRC2	12	122989190	123011547	-1	protein_coding	65117	RSRC2	0.992877	0.0151201	0	0	0	NA	NA	NA	NA	Yes	Adult_Cortex:Fetal_Cortex:GM12878:IMR90:Mesenchymal_Stem_Cell:hESC	9.546e-09	rs641760;rs28372579:rs641760:rs641760;rs4930719;rs28372579:rs641760;rs28372579;rs12820906	17
ENSG00000139970	RTN1	14	60062694	60337684	-1	protein_coding	6252	RTN1	0.959599	-0.243476	0	0	3	1.4007e-15	0	eQTLGen_trans_eQTLs	NA	No	NA	1.951e-10	rs1986649;rs7986407;rs9532580;rs9549260	19
ENSG00000103449	SALL1	16	51169886	51185278	-1	protein_coding	6299	SALL1	0.994674	-0.4331	0	0	0	NA	NA	NA	NA	Yes	IMR90:Mesenchymal_Stem_Cell:Mesendoderm:Neural_Progenitor_Cell:Trophoblast-like_Cell:hESC	2.816e-07	rs66998222	20
ENSG00000187033	SAMD7	3	169629360	169656963	1	protein_coding	344658	SAMD7	6.78008e-06	-0.632168	0	0	11	5.80237e-05	0.00522728	PsychENCODE_eQTLs	NA	No	NA	4.061e-08	rs2293607	4
ENSG00000155307	SAMSN1	21	15857549	15955723	-1	protein_coding	64092	SAMSN1	0.0756024	0.58227	0	0	3	1.9421e-07	0.00196337	eQTLGen_trans_eQTLs	NA	No	NA	1.951e-10	rs1986649;rs7986407;rs9532580;rs9549260	19
ENSG00000141504	SAT2	17	7529552	7531194	-1	protein_coding	112483	SAT2	0.0176163	-0.384311	0	0	2	8.8145e-11	0	eQTLGen_cis_eQTLs	NA	No	NA	4.932e-08	rs78414518	21
ENSG00000139697	SBNO1	12	123773656	123849390	-1	protein_coding	55206	SBNO1	1	-1.46751	24	22.9	233	9.4775e-41	0	eQTLcatalogue/CEDAR_monocyte_CD14:eQTLcatalogue/CEDAR_neutrophil_CD15:eQTLcatalogue/CEDAR_T-cell_CD4:eQTLcatalogue/CEDAR_T-cell_CD8:eQTLGen_cis_eQTLs:BIOSQTL/BIOS_eQTL_geneLevel:GTEx/v8/Muscle_Skeletal:GTEx/v8/Cells_Cultured_fibroblasts	NA	Yes	Promoter_anchored_loops:Adult_Cortex:Fetal_Cortex	7.637e-09	rs641760;rs4930719;rs28372579;rs12820906;rs1716162;rs641760:rs641760;rs28372579:rs641760;rs28372579:rs4930719	17
ENSG00000184178	SCFD2	4	53739149	54232242	-1	protein_coding	152579	SCFD2	1.87393e-06	0.0321403	0	0	0	NA	NA	NA	NA	Yes	Fetal_Cortex:Left_Ventricle:IMR90:Mesenchymal_Stem_Cell:Mesendoderm:hESC	6.568e-14	rs67751869:rs55732414:rs4864806;rs62323678:rs62323678:rs4864806:rs66604018	5
ENSG00000188076	SCGB1C1	11	193080	194573	1	protein_coding	147199	SCGB1C1	3.34416e-05	0.362499	4	16.83	33	2.12e-46	0	eQTLGen_cis_eQTLs:BIOSQTL/BIOS_eQTL_geneLevel	NA	No	NA	4.776e-13	rs547025;rs11246035;rs532483;rs12419714	11
ENSG00000008952	SEC62	3	169684423	169716161	1	protein_coding	7095	SEC62	0.967258	-1.13626	0	0	0	NA	NA	NA	NA	Yes	Adult_Cortex:GM12878:Mesendoderm:hESC	1.016e-07	rs2293607	4
ENSG00000161956	SENP3	17	7465192	7475287	1	protein_coding	26168	SENP3	0.995995	NA	2	11.37	0	NA	NA	NA	NA	No	NA	2.446e-14	rs143094271;rs78414518	21
ENSG00000183955	SETD8	12	123868320	123893905	1	protein_coding	387893	SETD8	0.945359	0.950256	18	9.622	229	7.5041e-153	0	eQTLcatalogue/BLUEPRINT_ge_monocyte:eQTLcatalogue/BLUEPRINT_ge_neutrophil:eQTLcatalogue/CEDAR_neutrophil_CD15:eQTLcatalogue/Lepik_2017_ge_blood:eQTLcatalogue/TwinsUK_ge_blood:PsychENCODE_eQTLs:eQTLGen_cis_eQTLs:BIOSQTL/BIOS_eQTL_geneLevel:CMC_SVA_cis:GTEx/v8/Whole_Blood:GTEx/v8/Artery_Tibial:GTEx/v8/Brain_Cerebellar_Hemisphere:GTEx/v8/Brain_Cerebellum:GTEx/v8/Esophagus_Gastroesophageal_Junction:G…	NA	Yes	EP_links_oneway:Promoter_anchored_loops:Adult_Cortex:Fetal_Cortex	7.637e-09	rs641760;rs28372579;rs4930719;rs12820906;rs1716162;rs28372579:rs641760	17
ENSG00000156384	SFR1	10	105881816	105886143	1	protein_coding	119392	SFR1	0.000222755	0.0546284	0	0	0	NA	NA	NA	NA	Yes	Adult_Cortex:Fetal_Cortex:Aorta:Dorsolateral_Prefrontal_Cortex:Hippocampus:Left_Ventricle:Liver:Lung:Right_Ventricle:GM12878:IMR90:Mesenchymal_Stem_Cell:Mesendoderm:Trophoblast-like_Cell:hESC	1.204e-09	rs7902587:rs9419958	10
ENSG00000100359	SGSM3	22	40766595	40806293	1	protein_coding	27352	SGSM3	1.00601e-06	-0.227062	0	0	8	0.000121348	0.00996216	PsychENCODE_eQTLs	NA	Yes	Aorta:Left_Ventricle:Liver:GM12878:IMR90:Mesenchymal_Stem_Cell:Mesendoderm:Trophoblast-like_Cell:hESC	1.037e-12	rs112251865;rs6001872:rs112251865	23
ENSG00000107957	SH3PXD2A	10	105348285	105615301	-1	protein_coding	9644	SH3PXD2A	0.232738	-1.21155	0	0	26	2.4966e-23	0	eQTLGen_cis_eQTLs:GTEx/v8/Brain_Frontal_Cortex_BA9	NA	Yes	IMR90:Mesenchymal_Stem_Cell:Mesendoderm:Trophoblast-like_Cell:hESC	1.204e-09	rs7902587;rs9419958;rs7907606;rs7902587:rs9419958	10
ENSG00000129214	SHBG	17	7517382	7536700	1	protein_coding	6462	SHBG	0.000188842	0.23975	0	0	0	NA	NA	NA	NA	Yes	Adult_Cortex:Fetal_Cortex:Hippocampus:GM12878:IMR90:Mesenchymal_Stem_Cell:Mesendoderm:hESC	2.446e-14	rs143094271:rs78414518:rs17879377	21
ENSG00000182199	SHMT2	12	57623110	57628718	1	protein_coding	6472	SHMT2	0.00748753	-0.580842	0	0	1	4.8726e-06	0.0322928	eQTLGen_trans_eQTLs	NA	No	NA	4.12e-11	rs4449583	7
ENSG00000185187	SIGIRR	11	405716	417455	-1	protein_coding	59307	SIGIRR	0.00530889	-0.434585	0	0	1	7.65886e-05	3.32481e-63	GTEx/v8/Artery_Tibial	NA	Yes	Promoter_anchored_loops	4.629e-12	rs547025;rs547025:rs532483	11
ENSG00000142082	SIRT3	11	215458	236931	-1	protein_coding	23410	SIRT3	2.70052e-05	-0.340985	9	29	32	4.72394e-08	4.54184e-05	BIOSQTL/BIOS_eQTL_geneLevel:GTEx/v8/Muscle_Skeletal	NA	Yes	Promoter_anchored_loops:GM12878:IMR90:Mesenchymal_Stem_Cell:Trophoblast-like_Cell:hESC	4.776e-13	rs547025;rs532483;rs12419714;rs547025:rs532483	11
ENSG00000140090	SLC24A4	14	92788925	92962596	1	protein_coding	123041	SLC24A4	3.16711e-06	-0.678266	0	0	2	1.1305e-09	3.9185e-05	eQTLGen_trans_eQTLs	NA	No	NA	1.951e-10	rs1986649;rs7986407;rs9532580	19
ENSG00000102743	SLC25A15	13	41363548	41384247	1	protein_coding	10166	SLC25A15	0.00124732	NA	1	3.125	222	4.1803e-15	0	eQTLcatalogue/GEUVADIS_ge_LCL:eQTLcatalogue/TwinsUK_ge_fat:eQTLcatalogue/TwinsUK_ge_LCL:eQTLGen_cis_eQTLs:BIOSQTL/BIOS_eQTL_geneLevel:GTEx/v8/Adipose_Subcutaneous:GTEx/v8/Artery_Aorta:GTEx/v8/Artery_Tibial:GTEx/v8/Colon_Sigmoid:GTEx/v8/Esophagus_Mucosa:GTEx/v8/Esophagus_Muscularis:GTEx/v8/Heart_Atrial_Appendage:GTEx/v8/Heart_Left_Ventricle:GTEx/v8/Muscle_Skeletal:GTEx/v8/Nerve_Tibial:GTEx/v8/Cell…	NA	Yes	Liver:GM12878:IMR90:Mesenchymal_Stem_Cell:Mesendoderm:hESC	1.066e-11	rs2297014;rs1986649;rs61963209;rs9566605;rs9532585;rs7986407;rs9532580;rs9532583;rs9549260;rs9549296;rs61963209:rs117245733	18:19:00
ENSG00000100372	SLC25A17	22	41165634	41215403	-1	protein_coding	10478	SLC25A17	0.0241848	-0.779479	0	0	2	6.03519e-05	2.71274e-05	GTEx/v8/Lung	NA	Yes	Left_Ventricle:IMR90:Mesenchymal_Stem_Cell:Mesendoderm:hESC	3.144e-12	rs112251865;rs6001872:rs112251865	23
ENSG00000181856	SLC2A4	17	7184986	7191576	1	protein_coding	6517	SLC2A4	0.135387	-0.200421	0	0	0	NA	NA	NA	NA	Yes	Fetal_Cortex	3.419e-07	rs17879377	21
ENSG00000111371	SLC38A1	12	46576846	46663800	-1	protein_coding	81539	SLC38A1	0.975432	-0.330577	0	0	139	8.56394e-08	1.82002e-16	eQTLcatalogue/CEDAR_T-cell_CD4:PsychENCODE_eQTLs:GTEx/v8/Artery_Aorta:GTEx/v8/Esophagus_Mucosa:GTEx/v8/Cells_Cultured_fibroblasts:GTEx/v7/Esophagus_Mucosa	NA	Yes	Left_Ventricle:Liver:GM12878:IMR90:Mesenchymal_Stem_Cell:Mesendoderm:Trophoblast-like_Cell:hESC	1.371e-09	rs7976280;rs11531206	16
ENSG00000134294	SLC38A2	12	46751972	46766650	-1	protein_coding	54407	SLC38A2	0.969357	-1.91804	15	19.81	108	2.86647e-06	0.000351501	PsychENCODE_eQTLs:CMC_SVA_cis:GTEx/v8/Brain_Caudate_basal_ganglia:GTEx/v8/Nerve_Tibial:GTEx/v8/Cells_Cultured_fibroblasts	NA	No	NA	1.371e-09	rs7976280;rs11531206	16
ENSG00000139209	SLC38A4	12	47158546	47226191	-1	protein_coding	55089	SLC38A4	0.942982	0.540139	0	0	2	0.000178989	0.0221363	GTEx/v8/Cells_Cultured_fibroblasts	NA	Yes	Liver:Right_Ventricle:GM12878:IMR90:Mesenchymal_Stem_Cell:Mesendoderm:Trophoblast-like_Cell:hESC	2.087e-09	rs7976280;rs7976280:rs11531206	16
ENSG00000119457	SLC46A2	9	115641200	115653193	-1	protein_coding	57864	SLC46A2	0.000292934	0.0513644	0	0	3	8.5217e-09	0.00014876	eQTLGen_trans_eQTLs	NA	No	NA	1.951e-10	rs1986649;rs7986407;rs9532580;rs9549260	19
ENSG00000174358	SLC6A19	5	1201710	1225232	1	protein_coding	340024	SLC6A19	NA	5.67361	0	0	0	NA	NA	NA	NA	Yes	IMR90	2.256e-11	rs4449583;rs7705526:rs4449583:rs56023411:rs7712562	7
ENSG00000142319	SLC6A3	5	1392909	1445545	-1	protein_coding	6531	SLC6A3	0.997037	1.18782	0	0	0	NA	NA	NA	NA	Yes	IMR90	2.256e-11	rs4449583;rs7705526:rs4449583:rs56023411:rs7712562	7
ENSG00000065613	SLK	10	105726959	105788991	1	protein_coding	9748	SLK	0.428398	-0.261974	0	0	28	1.3856e-42	0	eQTLGen_cis_eQTLs:BIOSQTL/BIOS_eQTL_geneLevel:GTEx/v8/Artery_Aorta:GTEx/v8/Artery_Tibial:GTEx/v8/Skin_Not_Sun_Exposed_Suprapubic:GTEx/v8/Skin_Sun_Exposed_Lower_leg:GTEx/v7/Artery_Tibial:GTEx/v7/Skin_Sun_Exposed_Lower_leg	NA	Yes	Adult_Cortex:Fetal_Cortex:Adrenal:Aorta:Hippocampus:Left_Ventricle:Liver:Psoas:Spleen:GM12878:IMR90:Mesenchymal_Stem_Cell:Mesendoderm:Trophoblast-like_Cell:hESC	1.204e-09	rs7902587;rs9419958;rs7907606;rs7902587:rs9419958	10
ENSG00000084070	SMAP2	1	40810522	40888998	1	protein_coding	64744	SMAP2	0.0142856	-1.1554	0	0	1	3.0521e-07	0.00282185	eQTLGen_trans_eQTLs	NA	No	NA	6.794e-10	rs7986407;rs9532580	19
ENSG00000184209	SNRNP35	12	123942188	123957701	1	protein_coding	11066	SNRNP35	2.28333e-07	-0.463368	0	0	225	8.6274e-13	0	eQTLcatalogue/BLUEPRINT_ge_T-cell:eQTLcatalogue/Kasela_2017_T-cell_CD4:eQTLcatalogue/Kasela_2017_T-cell_CD8:PsychENCODE_eQTLs:eQTLGen_cis_eQTLs	NA	Yes	GM12878:IMR90:Mesenchymal_Stem_Cell	7.637e-09	rs641760;rs28372579;rs12820906;rs1716162;rs4930719;rs28372579:rs28372579:rs4930719;rs28372579:rs4930719	17
ENSG00000156395	SORCS3	10	106400859	107024993	1	protein_coding	22986	SORCS3	0.325134	0.170375	0	0	1	0.000157629	0.0124895	PsychENCODE_eQTLs	NA	No	NA	5.563e-09	rs9419958	10
ENSG00000129194	SOX15	17	7491496	7493488	-1	protein_coding	6665	SOX15	0.361606	-0.211833	1	8.828	0	NA	NA	NA	NA	No	NA	1.438e-07	rs78414518	21
ENSG00000181323	SPEM1	17	7323679	7324951	1	protein_coding	374768	SPEM1	0.0234531	-0.21509	0	0	0	NA	NA	NA	NA	Yes	IMR90	2.446e-14	rs143094271	21
ENSG00000100380	ST13	22	41220539	41253026	-1	protein_coding	6767	ST13	0.659424	-1.5853	0	0	0	NA	NA	NA	NA	Yes	Left_Ventricle:Liver:IMR90:Mesenchymal_Stem_Cell:Mesendoderm:Trophoblast-like_Cell:hESC	1.037e-12	rs6001872:rs112251865	23
ENSG00000010327	STAB1	3	52529354	52558511	1	protein_coding	23166	STAB1	2.79799e-25	-0.149285	0	0	1	4.4459e-07	0.00400778	eQTLGen_trans_eQTLs	NA	No	NA	6.794e-10	rs7986407;rs9532580	19
ENSG00000164506	STXBP5	6	147525561	147706866	1	protein_coding	134957	STXBP5	0.999992	NA	0	0	1	3.1042e-06	0.0222866	eQTLGen_trans_eQTLs	NA	No	NA	6.794e-10	rs7986407;rs9532580	19
ENSG00000173597	SULT1B1	4	70586880	70653679	-1	protein_coding	27284	SULT1B1	6.23607e-05	0.219436	25	7.634	46	1.7839e-22	0	eQTLcatalogue/CEDAR_transverse_colon:eQTLcatalogue/GENCORD_ge_fibroblast:eQTLcatalogue/Lepik_2017_ge_blood:eQTLGen_cis_eQTLs:BIOSQTL/BIOS_eQTL_geneLevel:GTEx/v8/Adipose_Subcutaneous:GTEx/v8/Adipose_Visceral_Omentum:GTEx/v8/Adrenal_Gland:GTEx/v8/Whole_Blood:GTEx/v8/Artery_Aorta:GTEx/v8/Artery_Tibial:GTEx/v8/Esophagus_Muscularis:GTEx/v8/Heart_Atrial_Appendage:GTEx/v8/Heart_Left_Ventricle:GTEx/v8/Lu…	NA	No	NA	3.826e-10	rs4694227;rs12640488	6
ENSG00000109193	SULT1E1	4	70676498	70725870	-1	protein_coding	6783	SULT1E1	7.40467e-05	0.258449	0	0	46	3.75036e-41	0	eQTLcatalogue/GENCORD_ge_fibroblast:BIOSQTL/BIOS_eQTL_geneLevel:GTEx/v8/Liver:GTEx/v8/Nerve_Tibial:GTEx/v7/Nerve_Tibial	NA	No	NA	3.826e-10	rs4694227;rs12640488	6
ENSG00000100242	SUN2	22	39130730	39190148	-1	protein_coding	25777	SUN2	2.40833e-07	0.0720447	0	0	0	NA	NA	NA	NA	Yes	Mesenchymal_Stem_Cell	3.144e-12	rs6001872:rs112251865	23
ENSG00000131018	SYNE1	6	152442819	152958936	-1	protein_coding	23345	SYNE1	3.75068e-27	-0.109891	87	13.8	7	9.41836e-08	5.7246e-05	CMC_SVA_cis:GTEx/v8/Artery_Aorta:GTEx/v8/Liver:GTEx/v8/Pancreas:GTEx/v7/Liver:GTEx/v7/Pancreas	NA	No	NA	3.648e-32	rs73781102;rs1408462;rs7768921;rs4870084;rs6557208;rs7741405;rs12110523;rs58415480;rs9479275;rs75730028;rs6901631;rs75510204;rs633891;rs6904757;rs13211170;rs584336;rs7742927;rs13206045;rs13196107;rs35569312;rs9371587;rs4870098;rs13216059;rs13211693;rs148780923	8
ENSG00000100321	SYNGR1	22	39745930	39781593	1	protein_coding	9145	SYNGR1	0.58149	0.577759	0	0	0	NA	NA	NA	NA	Yes	Left_Ventricle:IMR90:Mesenchymal_Stem_Cell:Mesendoderm:hESC	1.037e-12	rs6001872:rs112251865	23
ENSG00000137501	SYTL2	11	85405267	85522184	-1	protein_coding	54843	SYTL2	2.11827e-19	-0.466325	0	0	5	4.7816e-09	0.000119495	eQTLGen_trans_eQTLs	NA	No	NA	7.126e-08	rs2293607	4
ENSG00000100324	TAB1	22	39795746	39833065	1	protein_coding	10454	TAB1	0.00399581	-0.623712	0	0	0	NA	NA	NA	NA	Yes	Aorta:Left_Ventricle:Liver:GM12878:IMR90:Mesenchymal_Stem_Cell:Mesendoderm:Trophoblast-like_Cell:hESC	1.037e-12	rs6001872:rs112251865	23
ENSG00000176148	TCP11L1	11	33060963	33127489	1	protein_coding	55346	TCP11L1	0.088047	-1.15366	0	0	21	5.2978e-07	1.80741e-31	eQTLGen_cis_eQTLs:GTEx/v7/Artery_Tibial	NA	Yes	Mesenchymal_Stem_Cell	1.755e-20	rs2207548;rs932503;rs11031736;rs11031737;rs7122664;rs3858445;rs11031704:rs7116279;rs11031704:rs11031731:rs61889171:rs12280757:rs11031724	13
ENSG00000168778	TCTN2	12	124155660	124192948	1	protein_coding	79867	TCTN2	1.97172e-05	0.504613	0	0	1	1.6699e-05	0.0460282	eQTLGen_cis_eQTLs	NA	Yes	Adult_Cortex:Fetal_Cortex:Left_Ventricle:GM12878:IMR90:Mesenchymal_Stem_Cell:Mesendoderm:hESC	9.546e-09	rs4930719;rs641760;rs28372579:rs641760:rs641760;rs28372579:rs641760;rs28372579;rs12820906:rs28372579:rs4930719;rs28372579:rs4930719	17
ENSG00000164362	TERT	5	1253262	1295184	-1	protein_coding	7015	TERT	0.866151	NA	21	6.675	9	1.97517e-06	0.00444386	eQTLGen_cis_eQTLs:GTEx/v8/Skin_Not_Sun_Exposed_Suprapubic:GTEx/v8/Skin_Sun_Exposed_Lower_leg:GTEx/v7/Skin_Not_Sun_Exposed_Suprapubic:GTEx/v7/Skin_Sun_Exposed_Lower_leg	NA	No	NA	6.072e-15	rs11742908;rs10069690;rs2242652;rs4449583;rs7705526;rs7713218;rs72709458;rs2736100;rs2853677;rs2736099;rs2853676;rs7712562;rs56023411;rs2853672	7
ENSG00000086598	TMED2	12	124069078	124083116	1	protein_coding	10959	TMED2	0.79768	0.132646	0	0	0	NA	NA	NA	NA	Yes	Promoter_anchored_loops	1.67e-08	rs641760;rs28372579:rs641760;rs4930719;rs28372579:rs28372579	17
ENSG00000181284	TMEM102	17	7338762	7340998	1	protein_coding	284114	TMEM102	NA	0.0166729	0	0	1	2.0473e-05	2.71278e-12	GTEx/v8/Testis	NA	Yes	Adult_Cortex:Fetal_Cortex:IMR90	2.446e-14	rs41283405;rs17879377:rs143094271	21
ENSG00000179029	TMEM107	17	8076555	8079717	-1	protein_coding	84314	TMEM107	0.0289056	-0.522384	0	0	0	NA	NA	NA	NA	Yes	Fetal_Cortex	3.419e-07	rs17879377	21
ENSG00000205544	TMEM256	17	7306294	7307456	-1	protein_coding	254863	TMEM256	2.94821e-05	-0.394809	0	0	0	NA	NA	NA	NA	Yes	Liver:IMR90:Mesenchymal_Stem_Cell	2.446e-14	rs143094271:rs17879377	21
ENSG00000187838	TMEM256-PLSCR3	17	7293046	7307416	-1	protein_coding	57048	TMEM256-PLSCR3	0.245307	NA	0	0	0	NA	NA	NA	NA	Yes	Liver:IMR90:Mesenchymal_Stem_Cell	2.446e-14	rs143094271:rs17879377	21
ENSG00000167874	TMEM88	17	7758383	7759417	1	protein_coding	92162	TMEM88	0.353474	0.00944329	0	0	0	NA	NA	NA	NA	Yes	IMR90	3.419e-07	rs17879377	21
ENSG00000239697	TNFSF12	17	7452208	7464925	1	protein_coding	8742	TNFSF12	0.997954	-0.448531	1	11.37	15	2.6784e-17	0	eQTLcatalogue/Lepik_2017_ge_blood:eQTLGen_cis_eQTLs:BIOSQTL/BIOS_eQTL_geneLevel:GTEx/v8/Whole_Blood	NA	No	NA	3.841e-26	rs143094271;rs78414518;rs41283405;rs78378222;rs17879377;rs35850753	21
ENSG00000248871	TNFSF12-TNFSF13	17	7452416	7464918	1	protein_coding	407977	TNFSF12-TNFSF13	0.997954	-0.561606	1	11.37	11	4.83701e-08	4.53952e-05	BIOSQTL/BIOS_eQTL_geneLevel	NA	No	NA	2.446e-14	rs143094271;rs78414518;rs41283405;rs17879377	21
ENSG00000161955	TNFSF13	17	7461609	7464925	1	protein_coding	8741	TNFSF13	0.877768	-0.927189	1	11.37	11	1.9126e-10	0	eQTLcatalogue/BLUEPRINT_ge_neutrophil:eQTLGen_cis_eQTLs:BIOSQTL/BIOS_eQTL_geneLevel	NA	No	NA	2.446e-14	rs143094271;rs78414518;rs41283405;rs17879377	21
ENSG00000174292	TNK1	17	7283853	7293093	1	protein_coding	8711	TNK1	8.54609e-05	-0.435657	0	0	0	NA	NA	NA	NA	Yes	Fetal_Cortex:Liver:IMR90:Mesenchymal_Stem_Cell	2.446e-14	rs17879377:rs143094271	21
ENSG00000100354	TNRC6B	22	40440821	40731812	1	protein_coding	23112	TNRC6B	1	-2.91639	76	16.12	43	1.20946e-05	5.99801e-06	GTEx/v8/Artery_Tibial:GTEx/v8/Esophagus_Muscularis	NA	Yes	EP_correlation_cell_type_oneway:Adrenal:Aorta:Hippocampus:Left_Ventricle:Liver:Pancreas:Psoas:Right_Ventricle:Spleen:GM12878:IMR90:Mesenchymal_Stem_Cell:Mesendoderm:Neural_Progenitor_Cell:Trophoblast-like_Cell:hESC	1.031e-12	rs112251865;rs6001872;rs6001872:rs112251865	23
ENSG00000131747	TOP2A	17	38544768	38574202	-1	protein_coding	7153	TOP2A	0.996224	-0.398755	0	0	2	6.9368e-08	0.000876601	eQTLGen_trans_eQTLs	NA	No	NA	7.126e-08	rs2293607	4
ENSG00000103460	TOX3	16	52471917	52581714	-1	protein_coding	27324	TOX3	0.994339	NA	0	0	0	NA	NA	NA	NA	Yes	Mesendoderm:hESC	2.816e-07	rs66998222	20
ENSG00000141510	TP53	17	7565097	7590856	-1	protein_coding	7157	TP53	0.912223	-0.120095	11	15.93	16	8.58731e-31	0	eQTLcatalogue/Fairfax_2014_IFN24:eQTLcatalogue/Lepik_2017_ge_blood:eQTLGen_cis_eQTLs:BIOSQTL/BIOS_eQTL_geneLevel:GTEx/v8/Adipose_Subcutaneous:GTEx/v8/Esophagus_Mucosa:GTEx/v8/Cells_Cultured_fibroblasts:GTEx/v8/Skin_Not_Sun_Exposed_Suprapubic:GTEx/v8/Skin_Sun_Exposed_Lower_leg:GTEx/v7/Thyroid	NA	Yes	Promoter_anchored_loops:Fetal_Cortex:Hippocampus:GM12878:IMR90:Mesenchymal_Stem_Cell:Mesendoderm:hESC	3.841e-26	rs41283405;rs78378222;rs17879377;rs35850753;rs143094271;rs78414518;rs138420351;rs143094271:rs78414518	21
ENSG00000171368	TPPP	5	660883	693510	-1	protein_coding	11076	TPPP	0.447861	4.58518	0	0	1	3.92953e-05	3.67145e-08	GTEx/v8/Artery_Tibial	NA	No	NA	2.235e-10	rs2736099	7
ENSG00000159713	TPPP3	16	67423712	67427438	-1	protein_coding	51673	TPPP3	0.311517	0.0216755	0	0	1	3.3194e-06	0.0235196	eQTLGen_trans_eQTLs	NA	No	NA	6.794e-10	rs7986407;rs9532580	19
ENSG00000169902	TPST1	7	65670186	65885530	1	protein_coding	8460	TPST1	0.0114811	-0.81713	0	0	3	2.3124e-11	0	eQTLGen_trans_eQTLs	NA	No	NA	1.951e-10	rs1986649;rs7986407;rs9532580;rs9549260	19
ENSG00000170043	TRAPPC1	17	7833663	7835441	-1	protein_coding	58485	TRAPPC1	0.227722	-0.0158494	0	0	0	NA	NA	NA	NA	Yes	Fetal_Cortex:Liver:GM12878:IMR90:Mesenchymal_Stem_Cell	1.438e-07	rs17879377:rs78414518	21
ENSG00000071539	TRIP13	5	892758	919472	1	protein_coding	9319	TRIP13	0.968635	NA	0	0	0	NA	NA	NA	NA	Yes	Promoter_anchored_loops	2.256e-11	rs56023411:rs7712562	7
ENSG00000118900	UBN1	16	4896666	4932361	1	protein_coding	29855	UBN1	0.997777	1.16893	0	0	1	9.7807e-07	0.00798759	eQTLGen_trans_eQTLs	NA	No	NA	7.578e-10	rs9549260	19
ENSG00000162543	UBXN10	1	20512578	20522541	1	protein_coding	127733	UBXN10	0.000293935	-1.34815	0	0	0	NA	NA	NA	NA	Yes	Left_Ventricle	1.347e-08	rs7521902:rs2092315	1
ENSG00000173610	UGT2A1	4	70454135	70518965	-1	protein_coding	10941	UGT2A1	2.73195e-11	-0.281771	3	2.717	0	NA	NA	NA	NA	No	NA	3.997e-09	rs4694227	6
ENSG00000213759	UGT2B11	4	70065669	70080449	-1	protein_coding	10720	UGT2B11	3.1471e-13	0.706561	0	0	7	6.3436e-06	0.0181127	eQTLGen_cis_eQTLs	NA	No	NA	3.997e-09	rs4694227	6
ENSG00000173915	USMG5	10	105148798	105156223	-1	protein_coding	84833	USMG5	0.243352	-0.219458	0	0	19	1.7873e-07	0.000605909	eQTLGen_cis_eQTLs	NA	Yes	Fetal_Cortex	1.707e-08	rs7902587	10
ENSG00000109189	USP46	4	53457138	53525502	-1	protein_coding	64854	USP46	0.911054	-0.237168	0	0	0	NA	NA	NA	NA	Yes	IMR90:Mesenchymal_Stem_Cell:Mesendoderm:Trophoblast-like_Cell:hESC	6.568e-14	rs55732414:rs67751869:rs4864806;rs62323678:rs62323678:rs4864806:rs66604018	5
ENSG00000090686	USP48	1	22004791	22110099	-1	protein_coding	84196	USP48	0.999997	0.336895	0	0	4	4.5616e-06	0.0131649	eQTLGen_cis_eQTLs	NA	Yes	Adult_Cortex:Fetal_Cortex:GM12878:IMR90:Mesenchymal_Stem_Cell	1.655e-20	rs3765350;rs12404660;rs41307810:rs3765350:rs2235529;rs10917130	1
ENSG00000038427	VCAN	5	82767284	82878122	1	protein_coding	1462	VCAN	0.999751	-0.333731	0	0	1	1.7567e-07	0.00174524	eQTLGen_trans_eQTLs	NA	No	NA	6.794e-10	rs7986407;rs9532580	19
ENSG00000146469	VIP	6	153071933	153080900	1	protein_coding	7432	VIP	0.00582894	-0.126612	0	0	0	NA	NA	NA	NA	Yes	IMR90:Mesendoderm:hESC	3.648e-32	rs35569312:rs1408462:rs58415480:rs12110523:rs4870084:rs6901631:rs75730028:rs633891:rs6904757:rs13206045;rs13196107;rs35569312	8
ENSG00000062716	VMP1	17	57784553	57919616	1	protein_coding	81671	VMP1	0.930656	-0.702995	0	0	3	1.619e-13	0	eQTLGen_trans_eQTLs	NA	No	NA	1.951e-10	rs1986649;rs7986407;rs9532580;rs9549260	19
ENSG00000139719	VPS33A	12	122714111	122751068	-1	protein_coding	65082	VPS33A	0.687969	-0.341571	0	0	0	NA	NA	NA	NA	Yes	Fetal_Cortex	1.17e-08	rs641760	17
ENSG00000139722	VPS37B	12	123349882	123380991	-1	protein_coding	79720	VPS37B	0.67681	-1.60126	0	0	1	1.8127e-05	0.0495673	eQTLGen_cis_eQTLs	NA	Yes	IMR90:Mesenchymal_Stem_Cell	9.546e-09	rs641760;rs641760:rs641760;rs28372579;rs12820906:rs641760;rs28372579:rs641760;rs4930719	17
ENSG00000120688	WBP4	13	41635410	41658137	1	protein_coding	11193	WBP4	0.000482126	-0.669249	0	0	166	2.2613e-19	0	eQTLGen_cis_eQTLs:GTEx/v8/Adipose_Subcutaneous:GTEx/v8/Esophagus_Gastroesophageal_Junction:GTEx/v8/Esophagus_Muscularis:GTEx/v8/Heart_Atrial_Appendage:GTEx/v8/Lung:GTEx/v8/Muscle_Skeletal:GTEx/v8/Nerve_Tibial:GTEx/v8/Skin_Sun_Exposed_Lower_leg:GTEx/v8/Thyroid:GTEx/v7/Heart_Atrial_Appendage:GTEx/v7/Muscle_Skeletal:GTEx/v7/Skin_Sun_Exposed_Lower_leg:GTEx/v6/Lung:GTEx/v6/Muscle_Skeletal	NA	Yes	Aorta:Left_Ventricle:Liver:Spleen:GM12878:IMR90:Mesenchymal_Stem_Cell:Mesendoderm:Trophoblast-like_Cell:hESC	1.185e-11	rs7986407;rs1986649;rs9532580;rs9532583;rs9549260;rs9532585;rs9549296;rs61963209:rs7986407;rs9532583:rs1986649:rs9549260:rs9532583:rs2297014:rs9532583	19
ENSG00000197748	WDR96	10	105889646	105992120	-1	protein_coding	80217	WDR96	1.11043e-14	-0.15501	0	0	4	0.000117219	9.13449e-35	GTEx/v8/Nerve_Tibial	NA	Yes	Fetal_Cortex:Aorta:Left_Ventricle:Liver:Right_Ventricle:Spleen:GM12878:IMR90:Mesenchymal_Stem_Cell:Mesendoderm:Neural_Progenitor_Cell:Trophoblast-like_Cell:hESC	1.204e-09	rs7902587;rs7902587:rs9419958	10
ENSG00000162552	WNT4	1	22443798	22470462	-1	protein_coding	54361	WNT4	0.153838	0.856327	14	20.3	51	2.31945e-12	1.34708e-30	GTEx/v8/Lung:GTEx/v8/Thyroid:GTEx/v7/Thyroid:GTEx/v6/Thyroid	NA	Yes	IMR90:Mesenchymal_Stem_Cell:Mesendoderm:Trophoblast-like_Cell	7.388e-21	rs2235529;rs10917130;rs3765350;rs12404660;rs10799737;rs7519889;rs41307810;rs12410251;rs3971300;rs72478520;rs7521902;rs2092315	1
ENSG00000141499	WRAP53	17	7589389	7606820	1	protein_coding	55135	WRAP53	0.617463	-1.78612	3	2.696	0	NA	NA	NA	NA	Yes	Promoter_anchored_loops:Fetal_Cortex:Hippocampus:GM12878:IMR90:Mesenchymal_Stem_Cell:Mesendoderm:hESC	2.446e-14	rs17879377;rs143094271:rs78414518	21
ENSG00000184937	WT1	11	32409321	32457176	-1	protein_coding	7490	WT1	NA	0.494647	89	19.46	73	6.9984e-06	0.000693854	PsychENCODE_eQTLs:GTEx/v8/Esophagus_Muscularis:GTEx/v8/Heart_Left_Ventricle:GTEx/v7/Brain_Frontal_Cortex_BA9:GTEx/v7/Esophagus_Muscularis	NA	Yes	Fetal_Cortex:Mesenchymal_Stem_Cell:Mesendoderm:Trophoblast-like_Cell	1.755e-20	rs6484574;rs7105538;rs12574749;rs11031751;rs28460016;rs10835904;rs3858445;rs7114908;rs2418910;rs4258351;rs2418911;rs7110547;rs11031783;rs12270749;rs12280757:rs11031724:rs11031704:rs7116279;rs11031704:rs11031731:rs61889171	13
ENSG00000196236	XPNPEP3	22	41253081	41363838	1	protein_coding	63929	XPNPEP3	8.88349e-06	-0.745194	0	0	21	1.0156e-06	3.15711e-29	eQTLGen_cis_eQTLs:BRAINEAC/WHMT:GTEx/v8/Artery_Tibial	NA	Yes	Left_Ventricle:Liver:IMR90:Mesenchymal_Stem_Cell:Mesendoderm:Trophoblast-like_Cell:hESC	1.037e-12	rs6001872;rs112251865;rs6001872:rs112251865	23
ENSG00000181472	ZBTB2	6	151685252	151712683	-1	protein_coding	57621	ZBTB2	0.979835	-0.386614	0	0	0	NA	NA	NA	NA	Yes	IMR90:Mesendoderm	2.766e-31	rs1408462:rs58415480:rs12110523:rs4870084:rs13206045;rs13196107;rs35569312:rs35569312	8
ENSG00000174282	ZBTB4	17	7362685	7387582	-1	protein_coding	57659	ZBTB4	0.99849	-0.565704	0	0	2	1.23121e-05	2.82859e-08	GTEx/v8/Artery_Tibial:GTEx/v8/Brain_Cortex:GTEx/v8/Esophagus_Gastroesophageal_Junction	NA	Yes	Spleen:GM12878:IMR90:Mesenchymal_Stem_Cell:Mesendoderm:Trophoblast-like_Cell	2.446e-14	rs41283405;rs143094271;rs143094271:rs78414518:rs17879377	21
ENSG00000184677	ZBTB40	1	22778344	22857650	1	protein_coding	9923	ZBTB40	1.21208e-05	0.274816	0	0	0	NA	NA	NA	NA	Yes	IMR90:Mesenchymal_Stem_Cell:Mesendoderm:Trophoblast-like_Cell:hESC	1.655e-20	rs2235529;rs10917130	1
ENSG00000149289	ZC3H12C	11	109964087	110042566	1	protein_coding	85463	ZC3H12C	0.998726	-3.14843	0	0	0	NA	NA	NA	NA	Yes	Liver:GM12878:IMR90:Mesenchymal_Stem_Cell:Mesendoderm:Trophoblast-like_Cell:hESC	1.049e-12	rs72993806:rs79088165:rs78142456	15
ENSG00000033030	ZCCHC8	12	122957417	122985518	-1	protein_coding	55596	ZCCHC8	0.777819	NA	0	0	47	2.01266e-05	0.0252615	GTEx/v8/Brain_Cerebellar_Hemisphere	NA	Yes	Adult_Cortex:Fetal_Cortex	7.637e-09	rs641760;rs12820906;rs28372579;rs641760:rs641760	17
ENSG00000151789	ZNF385D	3	21459915	22414812	-1	protein_coding	79750	ZNF385D	0.724322	0.203413	0	0	5	3.0424e-07	0.00282377	eQTLGen_trans_eQTLs	NA	No	NA	4.684e-13	rs2242652;rs4449583;rs7705526;rs2736100;rs2853677	7
ENSG00000179195	ZNF664	12	124456392	124499986	1	protein_coding	144348	ZNF664	0.00162679	-0.308462	0	0	0	NA	NA	NA	NA	Yes	Adult_Cortex:Trophoblast-like_Cell:hESC	9.546e-09	rs641760;rs4930719;rs28372579:rs641760:rs641760;rs28372579;rs12820906:rs641760	17
