# Supplementary material for: Integrative analysis of uterine leiomyoma genetics, epigenomics, and single-cell transcriptomics reveals causal genetic variants, gene targets, and cell types
Source: Research Square preprint supplement (doi:10.21203/rs.3.rs-2548537/v1), 2023-02-14
Supplement: Supplementary file 2 [file 54c0c63bb00cd8fdd66c2e22.xlsx]

## Sheet: Sheet1
No	GenomicLocus	uniqID	rsID	chr	Function	pos_hg19	p	nIndSigSNPs	IndSigSNPs
1	1	1:22450487:C:T	rs2235529	1	intronic	22450487	7.388e-21	13	rs2235529;rs12404660;rs10799737;rs7519889;rs12410251;rs3971300;rs72478520;rs7521902;rs2092315;rs41307810;rs2473290;rs10917130;rs3765350
2	2	1:172167002:C:T	rs59760198	1	intronic	172167002	2.763e-08	1	rs59760198
3	3	2:11702661:A:C	rs10929757	2	exonic	11702661	1.187e-12	15	rs10929757;rs6432220;rs13028479;rs4668732;rs7570979;rs1529868;rs10929759;rs11679605;rs16857668;rs10929753;rs10929754;rs12994384;rs974163;rs4669748;rs6728828
4	4	3:169482335:C:T	rs2293607	3	ncRNA_exonic	169482335	4.061e-08	1	rs2293607
5	5	4:54500538:A:G	rs4864806	4	intronic	54500538	5.947e-14	6	rs4864806;rs62323678;rs66604018;rs67751869;rs62325482;rs55732414
6	6	4:70600738:A:G	rs12640488	4	intronic	70600738	3.826e-10	2	rs12640488;rs4694227
7	7	5:1283755:C:T	rs72709458	5	intronic	1283755	6.072e-15	13	rs72709458;rs4449583;rs7705526;rs2736100;rs2736099;rs2853676;rs56023411;rs2853672;rs7712562;rs11742908;rs10069690;rs2242652;rs7713218
8	7	5:1287194:A:G	rs2853677	5	intronic	1287194	2.551e-08	10	rs2853677;rs2736099;rs2853676;rs56023411;rs2853672;rs7712562;rs7713218;rs4449583;rs7705526;rs2736100
9	8	6:152562271:C:G	rs58415480	6	intronic	152562271	3.648e-32	18	rs58415480;rs633891;rs6904757;rs13211170;rs584336;rs7742927;rs13206045;rs13196107;rs9371587;rs35569312;rs4870098;rs13211693;rs13216059;rs1408462;rs6557208;rs7741405;rs12110523;rs9479275
10	8	6:152567047:C:T	rs6901631	6	intronic	152567047	3.892e-11	9	rs6901631;rs75730028;rs633891;rs6904757;rs73781102;rs7768921;rs4870084;rs6557208;rs9479275
11	8	6:152592680:G:T	rs75510204	6	intronic	152592680	2.065e-08	1	rs75510204
12	8	6:152880372:A:G	rs148780923	6	intronic	152880372	4.131e-08	1	rs148780923
13	9	9:674217:C:G	rs138821078	9	ncRNA_exonic	674217	2.434e-08	3	rs138821078;rs10975803;rs10976044
14	9	9:680714:A:G	rs10815466	9	ncRNA_intronic	680714	5.634e-13	5	rs10815466;rs10976044;rs10739107;rs4740851;rs10975803
15	9	9:805074:C:G	rs1812266	9	intergenic	805074	9.004e-13	7	rs1812266;rs34800401;rs4742423;rs114680331;rs10115078;rs10976679;rs7036783
16	9	9:827224:A:G	rs2277163	9	intergenic	827224	2.875e-08	1	rs2277163
17	10	10:105675946:C:T	rs9419958	10	intronic	105675946	1.204e-09	3	rs9419958;rs7907606;rs7902587
18	11	11:232855:C:T	rs547025	11	intronic	232855	4.776e-13	4	rs547025;rs11246035;rs532483;rs12419714
19	12	11:30226528:A:G	rs11031006	11	intergenic	30226528	2.908e-08	1	rs11031006
20	13	11:32365430:A:G	rs11031731	11	upstream	32365430	2.035e-21	28	rs11031731;rs2207548;rs11031736;rs7122664;rs7105538;rs56911719;rs11031751;rs28460016;rs6484574;rs12574749;rs3858445;rs2418910;rs4258351;rs2418911;rs7110547;rs11031783;rs12270749;rs12282155;rs3920533;rs11031691;rs7116279;rs11031698;rs10835881;rs11031704;rs61889171;rs12280757;rs11031724;rs11031726
21	13	11:32372772:A:G	rs11031737	11	intergenic	32372772	2.756e-11	18	rs11031737;rs7122664;rs7105538;rs56911719;rs11031751;rs6484574;rs12574749;rs10835904;rs3858445;rs2418910;rs2418911;rs7110547;rs11031783;rs12270749;rs12282155;rs7116279;rs2207548;rs932503
22	13	11:32441111:C:T	rs7114908	11	intronic	32441111	1.263e-08	10	rs7114908;rs3858445;rs4258351;rs7110547;rs3920533;rs61889171;rs7122664;rs28460016;rs6484574;rs10835904
23	14	11:35085453:G:T	rs2553772	11	intergenic	35085453	1.198e-08	1	rs2553772
24	15	11:108315606:C:T	rs149934734	11	intronic	108315606	7.052e-19	8	rs149934734;rs189426461;rs79088165;rs117706999;rs78142456;rs71488291;rs111559044;rs182609357
25	15	11:108359689:C:G	rs72993806	11	intronic	108359689	7.685e-13	1	rs72993806
26	16	12:46817735:G:T	rs11531206	12	ncRNA_intronic	46817735	1.371e-09	3	rs11531206;rs9669403;rs7976280
27	17	12:123518866:C:T	rs641760	12	intronic	123518866	7.637e-09	5	rs641760;rs1716162;rs28372579;rs4930719;rs12820906
28	18	13:40723944:A:G	rs117245733	13	intergenic	40723944	2.521e-10	1	rs117245733
29	19	13:41178824:C:T	rs1986649	13	intronic	41178824	1.066e-11	10	rs1986649;rs7986407;rs9532580;rs9549260;rs9532583;rs9532585;rs2297014;rs9549296;rs9566605;rs61963209
30	20	16:51481596:A:G	rs66998222	16	intergenic	51481596	2.288e-08	1	rs66998222
31	21	17:7571752:G:T	rs78378222	17	UTR3	7571752	3.841e-26	7	rs78378222;rs17879377;rs35850753;rs138420351;rs143094271;rs78414518;rs41283405
32	22	20:5948227:A:G	rs16991615	20	exonic	5948227	2.826e-08	1	rs16991615
33	23	22:40665225:C:T	rs112251865	22	intronic	40665225	1.031e-12	2	rs112251865;rs6001872
34	24	23:14194731:C:T	rs181473301	23	intergenic	14194731	2.238e-11	1	rs181473301
