# Supplementary material for: Integrative analysis of uterine leiomyoma genetics, epigenomics, and single-cell transcriptomics reveals causal genetic variants, gene targets, and cell types
Source: Research Square preprint supplement (doi:10.21203/rs.3.rs-2548537/v1), 2023-02-14
Supplement: Supplementary file 3 [file 6e9baeee4ee4946f5bc120ee.xlsx]

## Sheet: sgRNA_and_genes_qPCR_primers
1-SNP region targeted sgRNAs
	Guide_sequence_forward	Guide_sequence_reverse	Location_hg38
ESR1_promoter_targeted_sgRNA	CACCGAGCTCTTTAACAGGCTCGAA	AAACTTCGAGCCTGTTAAAGAGCTC	chr6:151690572-151690594
rs584154480_SNP_region_targeted_sgRNA_1	CACCGATTGATCCTAGTTTCCCCTC	AAACGAGGGGAAACTAGGATCAATC	chr6:152241139-152241161
rs584154480_SNP_region_targeted_sgRNA_2	CACCGATCATTCTGAGTTATTCCAG	AAACCTGGAATAACTCAGAATGATC	chr6:152241155-152241177
rs584154480_SNP_region_Control_sgRNA	CACCGGTTGGGCTTTACATACTAC	AAACGTAGTATGTAAAGCCCAACC	chr6:152539076-152539098
rs10815466_SNP_region_targeted_sgRNA_1	CACCGAACATGCTAGGATGTTACT	AAACAGTAACATCCTAGCATGTTC	chr9:686812-686835
rs10815466_SNP_region_targeted_sgRNA_2	CACCGGGCCACTGTATAAACCGCA	AAACTGCGGTTTATACAGTGGCCC	chr9:694597-694619
rs10815466_SNP_region_Control_sgRNA	CACCGCGTTTCAAATACTTAAAGGG	AAACCCCTTTAAGTATTTGAAACGC	chr9:241244-241266
2-Gene expression qPCR primers
	Forward_pcr_primer	Reverse_pcr_primer
ARMT1	GTTCTACTCACCGTGGTTGTTGG	GGATTCCTGTGACCCATAGAAATT
CCDC170	GTCCACTGAGGACACCATTTTGG	CCAGACTCCTTTCCCAACTGTTC
SYNE1	CTAGTACCTCTACTGGGCATGC	TGACGCATACGGTCCAGAGACA
MYCT1	CACAACAAGTTTAGGGAGTCCATG	CAAGTACCAGCCCGATTGCCAT
VIP	CCAGTCAAACGTCACTCAGATGC	CTGGAAAGTCGGGAGATTCTCC
ESR1	GCTTACTGACCAACCTGGCAGA	GGATCTCTAGCCAGGCACATTC
WASHC1	GGAATATGGCTCCATCTTCACGG	TTGGTGCTCACGCACACAGGAA
FOXD4	TGCGCCTTCATTAGTGACCGCT	TGACGAAGCAGTCGTTCAGCGA
CBWD1	GAAACGGTTGCCTCTGCTGTTC	AGGGTCTGCTAATCCAGTGGTC
DOCK8	GCTCCTCTTCACAGAACTGGCT	TCACCTCTGGTTTGACACAGCG
KANK1	CACTGAAGAGCTGAGGAACCCT	TCTTGCTCAGGCTGGGATGTCT
DMRT1	CCTTATGTGCCTGGTCAGACAG	GCATCCTCAAAAGTGAAGAACTGG
DMRT2	TTCGAGCGCAAAGCTGTGTACC	TCCCTCCTACATAAGTCTCCGC
DMRT3	CGCTGCGTTGGACTGCCGAG	ATTGTCTGCCGACTTGCCGTCT
SMARCA2	GAAGAGTCCAGTAGGCAGGAAAC	CATCCACGTCTTGCTTAGCTGTC
3-H3K27Ac-Chip-qPCR primers
	Forward_pcr_primer	Reverse_pcr_primer	Location_hg38
Region_A_qPCR_primers	GAAATGGCAGCATCACGTCA	AGTGTCCTGAGGTGTTGTGA	chr9:686699-686878
Region_B_qPCR_primers	AGTTGGGGTTGCACTTAGGA	CTAGGGAGGCATGTGATGGT	chr9:694493-694647
Region_C_qPCR_primers	ACCCTGCTTCCCTCATGAAA	ACTCAGTTCTCATAACAGCCCT	chr9:240754-240905
ZNF333_qPCR_primers (Negative Control)	TGCAGCCAGTGTGGGAAAGC	GTGCTCGTCCGGAAGGGCTTG	chr19:14718765-14718883
