# Supplementary material for: Integrative analysis of uterine leiomyoma genetics, epigenomics, and single-cell transcriptomics reveals causal genetic variants, gene targets, and cell types
Source: Research Square preprint supplement (doi:10.21203/rs.3.rs-2548537/v1), 2023-02-14
Supplement: Supplementary file 4 [file 7545346803f32bb5f18cf5cb.xlsx]

## Sheet: Sheet1
GenomicLocus	uniqID	rsID	chr	rsID_pos_hg19	rsID_pos_hg38	p	start_hg19	end_hg19	start_hg38	end_38	SNPs_start	SNPs_end	nSNPs	nGWASSNPs	nIndSigSNPs	IndSigSNPs	nLeadSNPs	LeadSNPs
1	1:22450487:C:T	rs2235529	1	22450487	22123994	7.388e-21	22347396	22511594	22020903	22185101	rs12407439	rs12119429	63	61	13	rs2235529;rs12404660;rs10799737;rs7519889;rs12410251;rs3971300;rs72478520;rs7521902;rs2092315;rs41307810;rs2473290;rs10917130;rs3765350	1	rs2235529
2	1:172167002:C:T	rs59760198	1	172167002	172197862	2.763e-08	172166548	172184793	172197408	172215653	rs10911257	rs511206	3	3	1	rs59760198	1	rs59760198
3	2:11702661:A:C	rs10929757	2	11702661	11562535	1.187e-12	11662178	11736037	11522052	11595911	rs4669743	rs11679686	93	85	15	rs10929757;rs6432220;rs13028479;rs4668732;rs7570979;rs1529868;rs10929759;rs11679605;rs16857668;rs10929753;rs10929754;rs12994384;rs974163;rs4669748;rs6728828	1	rs10929757
4	3:169482335:C:T	rs2293607	3	169482335	169764547	4.061e-08	169476991	169528523	169759204	169810735	rs146997182	rs9831661	37	35	1	rs2293607	1	rs2293607
5	4:54500538:A:G	rs4864806	4	54500538	53634371	5.947e-14	54460856	54581990	53594689	53715823	rs55731250	rs66529708	25	25	6	rs4864806;rs62323678;rs66604018;rs67751869;rs62325482;rs55732414	1	rs4864806
6	4:70600738:A:G	rs12640488	4	70600738	69735020	3.826e-10	70524658	70639497	69658940	69773779	rs4694227	rs4280806	46	45	2	rs12640488;rs4694227	1	rs12640488
7	5:1283755:C:T	rs72709458	5	1283755	1283640	6.072e-15	1270983	1297918	1270868	1297803	rs11742908	rs7449190	21	20	14	rs72709458;rs4449583;rs7705526;rs2736100;rs2736099;rs2853676;rs56023411;rs2853672;rs7712562;rs11742908;rs10069690;rs2242652;rs7713218;rs2853677	2	rs72709458;rs2853677
8	6:152562271:C:G	rs58415480	6	152562271	152241136	3.648e-32	152538985	152880372	152217850	152559237	rs73781102	rs148780923	87	80	25	rs58415480;rs633891;rs6904757;rs13211170;rs584336;rs7742927;rs13206045;rs13196107;rs9371587;rs35569312;rs4870098;rs13211693;rs13216059;rs1408462;rs6557208;rs7741405;rs12110523;rs9479275;rs6901631;rs75730028;rs73781102;rs7768921;rs4870084;rs75510204;rs148780923	4	rs58415480;rs6901631;rs75510204;rs148780923
9	9:680714:A:G	rs10815466	9	680714	680714	5.634e-13	655962	840023	655962	840023	rs9408651	rs912064	90	86	14	rs138821078;rs10975803;rs10976044;rs10815466;rs10739107;rs4740851;rs1812266;rs34800401;rs4742423;rs114680331;rs10115078;rs10976679;rs7036783;rs2277163	4	rs138821078;rs10815466;rs1812266;rs2277163
10	10:105675946:C:T	rs9419958	10	105675946	103916188	1.204e-09	105631657	105694301	103871899	103934543	rs35623220	rs7902587	28	27	3	rs9419958;rs7907606;rs7902587	1	rs9419958
11	11:232855:C:T	rs547025	11	232855	232855	4.776e-13	183094	275752	183094	275752	rs568742522	rs12419714	35	33	4	rs547025;rs11246035;rs532483;rs12419714	1	rs547025
12	11:30226528:A:G	rs11031006	11	30226528	30204981	2.908e-08	30215261	30349487	30193714	30327941	rs11031002	rs10616649	22	20	1	rs11031006	1	rs11031006
13	11:32365430:A:G	rs11031731	11	32365430	32343884	2.035e-21	32294884	32507904	32273338	32486358	rs11031685	rs10835927	222	209	32	rs11031731;rs2207548;rs11031736;rs7122664;rs7105538;rs56911719;rs11031751;rs28460016;rs6484574;rs12574749;rs3858445;rs2418910;rs4258351;rs2418911;rs7110547;rs11031783;rs12270749;rs12282155;rs3920533;rs11031691;rs7116279;rs11031698;rs10835881;rs11031704;rs61889171;rs12280757;rs11031724;rs11031726;rs11031737;rs10835904;rs932503;rs7114908	3	rs11031731;rs11031737;rs7114908
14	11:35085453:G:T	rs2553772	11	35085453	35063906	1.198e-08	35072118	35098266	35050571	35076719	rs2553783	rs1425805	36	34	1	rs2553772	1	rs2553772
15	11:108315606:C:T	rs149934734	11	108315606	108444879	7.052e-19	107903818	108431166	108033092	108560439	rs36034326	rs78142456	102	97	9	rs149934734;rs189426461;rs79088165;rs117706999;rs78142456;rs71488291;rs111559044;rs182609357;rs72993806	2	rs149934734;rs72993806
16	12:46817735:G:T	rs11531206	12	46817735	46423952	1.371e-09	46727770	46858498	46333987	46464715	rs1471223	rs4077707	146	129	3	rs11531206;rs9669403;rs7976280	1	rs11531206
17	12:123518866:C:T	rs641760	12	123518866	123034319	7.637e-09	123450765	123913433	122966218	123428886	rs4148856	rs4930718	234	218	5	rs641760;rs1716162;rs28372579;rs4930719;rs12820906	1	rs641760
18	13:40723944:A:G	rs117245733	13	40723944	40149807	2.521e-10	40723944	40723944	40149807	40149807	rs117245733	rs117245733	1	1	1	rs117245733	1	rs117245733
19	13:41178824:C:T	rs1986649	13	41178824	40604687	1.066e-11	41143720	41535409	40569583	40961273	rs2721069	rs61963226	252	233	10	rs1986649;rs7986407;rs9532580;rs9549260;rs9532583;rs9532585;rs2297014;rs9549296;rs9566605;rs61963209	1	rs1986649
20	16:51481596:A:G	rs66998222	16	51481596	51447685	2.288e-08	51464612	51488129	51430701	51454218	rs11642312	rs12325192	16	14	1	rs66998222	1	rs66998222
21	17:7571752:G:T	rs78378222	17	7571752	7668434	3.841e-26	7417640	7700063	7514323	7796745	rs8753	rs138420351	16	16	7	rs78378222;rs17879377;rs35850753;rs138420351;rs143094271;rs78414518;rs41283405	1	rs78378222
22	20:5948227:A:G	rs16991615	20	5948227	5967581	2.826e-08	5948227	5948227	5967581	5967581	rs16991615	rs16991615	1	1	1	rs16991615	1	rs16991615
23	22:40665225:C:T	rs112251865	22	40665225	40269221	1.031e-12	40528220	40722745	40132216	40326741	rs1807579	rs4821943	76	65	2	rs112251865;rs6001872	1	rs112251865
24	23:14194731:C:T	rs181473301	23	14194731	14176609	2.238e-11	14194731	14194731	14176609	14176609	rs181473301	rs181473301	1	1	1	rs181473301	1	rs181473301
