# Supplementary material for: Integrative analysis of uterine leiomyoma genetics, epigenomics, and single-cell transcriptomics reveals causal genetic variants, gene targets, and cell types
Source: Research Square preprint supplement (doi:10.21203/rs.3.rs-2548537/v1), 2023-02-14
Supplement: Supplementary file 5 [file 83f947d92655847062b127fd.xlsx]

## Sheet: UF_GWAS_referred_genes
Chr	Gene symbol	GWAS_referenced_paper	Lead_SNPs
1	C1QA	Rafnar et al.	(rs10917151)
1	C1QB	Rafnar et al.	(rs10917151)
1	C1QC	Rafnar et al.	(rs10917151)
1	CDC42	Rafnar et al/Gallagher et al./Valimaki et al.	(rs10917151)/(rs7412010)/(rs2235529)
1	EPHA8	Rafnar et al.	(rs10917151)
1	EPHB2	Rafnar et al.	(rs10917151)
1	HTR1D	Rafnar et al.	(rs10917151)
1	KDM1A	Rafnar et al.	(rs10917151)
1	LUZP1	Rafnar et al.	(rs10917151)
1	MIR3115	Rafnar et al.	(rs10917151)
1	MIR4418	Rafnar et al.	(rs10917151)
1	MIR4419A	Rafnar et al.	(rs10917151)
1	MIR4684	Rafnar et al.	(rs10917151)
1	MIR6127	Rafnar et al.	(rs10917151)
1	RAP1GAP	Rafnar et al.	(rs10917151)
1	USP48	Rafnar et al.	(rs10917151)
1	WNT4	Rafnar et al/Gallagher et al./Valimaki et al.	(rs10917151)/(rs7412010)/(rs2235529)
1	ZBTB40	Rafnar et al.	(rs10917151)
2	BABAM2	Gallagher et al.	(rs55819434)
2	GREB1	Rafnar et al/Gallagher et al./Valimaki et al.	(rs148143917)(rs10929757)/(rs35417544)/(rs10929757)
2	MIR4429	Rafnar et al.	(rs148143917)
2	PDIA6	Rafnar et al.	(rs148143917)
3	NEK10	Rafnar et al.	(rs479404)
3	TERC	Gallagher et al./Valimaki et al.	(rs35446936)/(rs10936600)
4	LNX1	Gallagher et al.	(rs62323682)
4	PDGFRA	Gallagher et al.	(rs62323682)
4	NA	Valimaki et al.	(rs62323680)
4	PDLIM5	Gallagher et al.	(rs4699299)
4	SCFD2	Rafnar et al.	(rs765333492)
4	SULT1B1	Rafnar et al/Gallagher et al./Valimaki et al.	(rs2202282)/(rs12640488)/(rs2202282)
4	SULT1E1	Rafnar et al./ Valimaki et al.	(rs2202282)/ (rs2202282)
5	TERT	Rafnar et al./Gallagher et al./Valimaki et al.	(rs10069690)/(rs72709458)/(rs72709458)
5	UIMC1	Gallagher et al./Valimaki et al.	(rs2456181)/ (rs2456181)
5	ZNF346	Gallagher et al./Valimaki et al.	(rs2456181)/ (rs2456181)
6	ARMT1	Rafnar et al.	(rs58415480)
6	CCDC170	Rafnar et al.	(rs58415480)
6	ESR1	Rafnar et al./Gallagher et al./Valimaki et al.	(rs58415480)/(rs58415480)/(rs58415480)
6	MYCT1	Rafnar et al.	(rs58415480)
6	RMND1	Rafnar et al.	(rs58415480)
6	SYNE1	Rafnar et al./Gallagher et al.	(rs58415480)/(rs58415480)
6	VIP	Rafnar et al.	(rs58415480)
6	GRM4	Gallagher et al.	(rs116251328)
6	HMGA1	Gallagher et al.	(rs116251328)
7	WNT2	Gallagher et al.	(rs2270206)
9	DMRT1	Rafnar et al./Valimaki et al.	(rs7030354)/(rs7027685)
9	DOCK8	Rafnar et al.	(rs73639400)(rs7030354)
9	KANK1	Rafnar et al./Gallagher et al.	(rs73639400)(rs7030354)/(rs10976689)
10	ARHGAP12	Gallagher et al.	(rs10508765)
10	ZEB1	Gallagher et al.	(rs10508765)
10	CFAP43	Rafnar et al.	(rs7907606)
10	CFAP58	Rafnar et al.	(rs7907606)
10	COL17A1	Rafnar et al.	(rs7907606)
10	GSTO1	Rafnar et al.	(rs7907606)
10	GSTO2	Rafnar et al.	(rs7907606)
10	ITPRIP	Rafnar et al.	(rs7907606)
10	LOC101927472	Rafnar et al.	(rs7907606)
10	MIR4482	Rafnar et al.	(rs7907606)
10	MIR609	Rafnar et al.	(rs7907606)
10	MIR936	Rafnar et al.	(rs7907606)
10	OBFC1	Rafnar et al./Cha et al./Gallagher et al./Valimaki et al.	(rs7907606)/(rs7913069)/(rs9419958)/(rs1265164)
10	SFR1	Rafnar et al.	(rs7907606)
10	SH3PXD2A	Rafnar et al.	(rs7907606)
10	SLK	Rafnar et al/Cha et al./Gallagher et al.	(rs7907606)/(rs7913069)/(rs9419958)
11	ATM	Rafnar et al./Valimaki et al.	(rs1801516)(rs1800057)/(rs141379009)
11	C11orf65	Gallagher et al.	(rs149934734)
11	KDELC2	Gallagher et al.	(rs149934734)
11	BET1L	Rafnar et al./Cha et al./Gallagher et al./ Edwards et al.	(rs11246001)/(rs2280543)/(rs547025)/ (rs2280543)
11	ODF3	Rafnar et al./Valimaki et al./Cha et al.	(rs507139)/(rs507139)/(rs2280543)
11	RIC8A	Cha et al./Gallagher et al.	(rs2280543)/(rs547025)
11	SCGB1C1	Rafnar et al./Valimaki et al.	(rs507139)/(rs507139)
11	SIRT3	Rafnar et al./Valimaki et al./Cha et al.	(rs507139)/(rs507139)/(rs2280543)
11	CCDC73	Rafnar et al.	(rs11031731)
11	DCDC1	Rafnar et al.	(rs11031731)
11	DCDC5	Rafnar et al.	(rs11031731)
11	EIF3M	Rafnar et al.	(rs11031731)
11	ELP4	Rafnar et al.	(rs11031731)
11	FSHB	Gallagher et al.	(rs11031006)
11	IMMP1L	Rafnar et al.	(rs11031731)
11	MPPED2	Rafnar et al.	(rs11031731)
11	QSER1	Rafnar et al.	(rs11031731)
11	WT1	Rafnar,Gallagher,Valimaki	(rs11031731)/(rs61889186)/(rs10835889)
11	CD44	Gallagher,Valimaki	(rs2785202)/(rs2553772)
11	PDHX	Gallagher et al.	(rs2785202)
12	PITPNM2	Gallagher et al.	(rs28583837)
12	PTPRR	Gallagher et al.	(rs11178393)
12	SLC38A2	Gallagher et al.	(rs2131371)
13	COG6	Rafnar et al.	(rs117245733)(rs7986407)
13	ELF1	Rafnar et al.	(rs117245733)
13	FOXO1	Rafnar,Gallagher, Valimaki	(rs7986407)(rs117245733)/(rs117245733)/ (7986407)
13	LHFP	Rafnar et al.	(rs7986407)
13	LINC00332	Rafnar et al.	(rs117245733)(rs7986407)
13	LINC00548	Rafnar et al.	(rs117245733)(rs7986407)
13	LINC00598	Rafnar et al.	(rs117245733)(rs7986407)
13	MIR4305	Rafnar et al.	(rs7986407)
13	MIR621	Rafnar et al.	(rs117245733)
13	MRPS31	Rafnar et al.	(rs117245733)
13	SLC25A15	Rafnar et al.	(rs117245733)
13	SUGT1P3	Rafnar et al.	(rs117245733)
13	TPTE2P5	Rafnar et al.	(rs117245733)
16	SALL1	Valimaki et al.	(rs66998222)
17	CCDC57	Eggert et al.	(rs4247357)
17	FASN	Eggert et al.	(rs4247357)
17	SLC16A3	Eggert et al.	(rs4247357)
17	SHBG	Gallagher et al.	(rs78378222)
17	TP53	Rafnar et al./Gallagher et al./Valimaki et al.	(rs78378222)/(rs78378222)/(rs78378222)
20	MCM8	Rafnar et al./Gallagher et al.	(rs16991615)/(rs16991615)
20	TRMT6	Gallagher et al.	(rs16991615)
22	ADSL	Rafnar et al.	(rs12484951)
22	ATF4	Rafnar et al.	(rs12484951)
22	CACNA1I	Rafnar et al.	(rs12484951)
22	DNAJB7	Rafnar et al.	(rs12484951)
22	ENTHD1	Rafnar et al.	(rs12484951)
22	FAM83F	Rafnar et al.	(rs12484951)
22	GRAP2	Rafnar et al.	(rs12484951)
22	LOC100130899	Rafnar et al.	(rs12484951)
22	MGAT3	Rafnar et al.	(rs12484951)
22	MIEF1	Rafnar et al.	(rs12484951)
22	RPS19BP1	Rafnar et al.	(rs12484951)
22	SGSM3	Rafnar et al.	(rs12484951)
22	SLC25A17	Rafnar et al.	(rs12484951)
22	ST13	Rafnar et al.	(rs12484951)
22	SYNGR1	Rafnar et al.	(rs12484951)
22	TAB1	Rafnar et al.	(rs12484951)
22	TNRC6B	Rafnar et al./Cha et al./Gallagher et al./ Edwards et al.	(rs12484951)/(rs12484776)/(rs4821939)/ (rs12484776)
22	XPNPEP3	Rafnar et al.	(rs12484951)
22	NA	Valimaki et al.	(rs733381)
X	NA	Valimaki et al.	(rs5930554)
X	MED12	Gallagher et al./Valimaki et al.	(rs4360450)/(rs5937008)
X	RAP2C	Gallagher et al.	(rs12392108)
22	CYTH4	Hellwege et al.	(rs739187)(rs4821628)(rs713939)(rs5995416)
12	NA	Valimaki et al.	(rs12832777)
3	NA	Valimaki et al.	(rs143835293)
